# Supplementary material for: Determining the climate impact of food for use in a climate tax—design of a consistent and transparent model
Source: Springer Nature journal article supplement (doi:10.1007/s11367-019-01597-8), 2019-03-08
Supplement: MOESM1 [file 16535570]

## Sheet: Guide to the material
Guide to the supplementary material to Moberg et al. (2019) Determining the climate impact of food for use in a climate tax – design of a consistent and transparent model The International Journal of Life Cycle Assessment Moberg, E.*, Walker Andersson, M., Säll, S., Hansson, P-A. & Röös, E. *Corresponding author: Department of Energy and Technology, Swedish University of Agricultural Sciences, Up…
This material presents datasets of the climate impact of a variety of food available on the Swedish market calculated with the proposed methodology in Moberg et al. (2019). Food products are divided into food groups as follows by the Table of content. For each product, the results of the calculations of the climate impact are given for the production countries representing more than 10% of the Sw…

## Sheet: Table of contents
Common data	Meat and eggs	Dairy products	Fish and seafood	Grains, oil crops and sugar	Vegetables, root crops and legumes	Fruits, berries, cocoa and coffee	Processed products
Reference list	Results meat and eggs	Results dairy products	Results fish and seafood	Results grains, oil crops and sugar	Results vegetables, root crops and legumes	Results fruits, berries, cocoa and coffee	Results processed products
Common input data sheet	Input data sheet	Input data sheet	Input data sheet	Input data sheet	Input data sheet	Input data sheet	Input data sheet
Additional motivation to excluded data	Products included:	Products included:	Products included:	Products included:	Products included:	Products included:	Products included:
Maintenance of data	Pork meat	Raw milk	Average of fish and seafood	Average grains	Tomato	Apple	Pasta
	Chicken meat	Pasteurized milk	Salmon	Wheat	Cucumber	Pear	Buns
	Eggs	Butter	Cod	Rye	Bell pepper	Melon	Biscuits
	Beef	Yogurt	Herring	Barley	Iceberg lettuce	Banana	Pastry
		Cream	Mackerel	Oats	Potato	Orange	Rusks
		Hard cheese	Saithe	Rice	Carrot	Lemon	Wheat bread
		Dessert cheese	Northern Prawn	Rapeseed/rapeseed oil	Onion	Avocado	Wheat-rye bread
		Crème fraiche	Alaska pollock	Olives/Olive oil	Leek	Kiwifruit	Crisp bread
		Milk powder	Rainbow trout	Sugar beet/sugar	Broccoli	Strawberry	Follow-up formula
			Roe (from cod fish)		White cabbage	Raspberry	Margarine
			Pangasius		Cauliflower	Cocoa/Cocoa powder/Cocoa butter	Low fat margarine
			European plaice		Peas	Coffee	Cocoa drink powder
			Hoki		Beans		Soda
							Cider (non-alcoholic)
							Beer (regular)
							Mineral water
							Juice of orange and apple
							Squash drink of strawberry and raspberry
							Milk chocolate
							Potato crisps
							Ice cream (dairy-based)

## Sheet: Meat and eggs
Results meat and eggs				Choice of climate metric:	GWP100 with fb
				Include land use change?	Yes
				Include soil carbon changes? Go to: "Common input data" --> "Choose factors for soil carbon changes"	Yes
				RESULTS			Feed production		Manure management
	Production system	Market share	Emissions	Agricultural emissions only	To farm-gate	To retail-gate	Energy use and mineral fertilizer production	Soil emissions	Direct emissions	Indirect emissions	Enteric fermentation	Soil carbon emissions	LUC emissions	Energy use in stables	Energy use at slaughter	Total after processing	Packaging	Transportation
PORK MEAT				Per kg carcass weight	Per kg carcass weight	Per kg carcass weight
Average		1	kg CO2e	2.27078	3.77641	4.62148
			kg CO2	0.471408	1.61097	2.24385	1.00818	0	0	0	0	0.415001	0.0564068	0.131381	0.273265	1.88423	0.1	0.0621614
			kg CH4	0.0208137	0.0211307	0.0232221	0.000317008	0	0.0121853	0	0.00862839	0	0	0	4.78366e-05	0.0211785	0	0
			kg N2O	0.00366346	0.00485572	0.00532914	0.00119226	0.00301355	0.000437171	0.000212732	0	0	0	0	4.45943e-06	0.00486017	0	0
Sweden	Conventional indoor	0.6938	kg CO2e	2.0454	3.49214	4.2291
			kg CO2	0.463879	1.5504	2.09675	0.992076	0	0	0	0	0.408373	0.055506	0.0944431	0.231841	1.78224	0.1	0.03
			kg CH4	0.0158067	0.0161186	0.0177264	0.000311945	0	0.00667749	0	0.0091292	0	0	0	4.78366e-05	0.0161665	0	0
			kg N2O	0.00350367	0.00467688	0.00513305	0.00117322	0.00296542	0.000388243	0.000149998	0	0	0	0	4.45943e-06	0.00468134	0	0
Denmark	Conventional indoor	0.114576	kg CO2e	2.77481	4.29165	5.16058
			kg CO2	0.48596	1.62543	2.23385	1.0393	0	0	0	0	0.427812	0.058148	0.100172	0.231841	1.85727	0.1	0.08
			kg CH4	0.034021	0.0343478	0.0377145	0.000326793	0	0.0258491	0	0.0081719	0	0	0	4.78366e-05	0.0343956	0	0
			kg N2O	0.00379911	0.00502818	0.00551824	0.00122906	0.00310658	0.000522575	0.000169961	0	0	0	0	4.45943e-06	0.00503263	0	0
Germany	Conventional indoor	0.118922	kg CO2e	2.91252	4.6395	5.83385
			kg CO2	0.49506	1.8376	2.75835	1.05876	0	0	0	0	0.435823	0.0592369	0.283779	0.448014	2.28561	0.1	0.13
			kg CH4	0.0331211	0.033454	0.0367344	0.000332913	0	0.026562	0	0.00655909	0	0	0	4.78366e-05	0.0335018	0	0
			kg N2O	0.00433338	0.00558546	0.0061293	0.00125208	0.00316475	0.000599772	0.00056886	0	0	0	0	4.45943e-06	0.00558992	0	0
Rest of Europe	Conventional indoor	0.072702	kg CO2e	2.57758	4.26541	5.53331
			kg CO2	0.481633	1.79546	2.82179	1.03004	0	0	0	0	0.424003	0.0576303	0.283779	0.448014	2.24347	0.1	0.23
			kg CH4	0.0276496	0.0279735	0.0307251	0.000323884	0	0.0196962	0	0.0079534	0	0	0	4.78366e-05	0.0280213	0	0
			kg N2O	0.00387872	0.00509684	0.00559353	0.00121812	0.00307892	0.00050353	0.000296273	0	0	0	0	4.45943e-06	0.0051013	0	0
CHICKEN MEAT				Per kg carcass weight	Per kg carcass weight	Per kg carcass weight
Average		1	kg CO2e	1.47999	2.70469	3.2623
			kg CO2	0.631153	1.60124	2.0506	0.852419	0	0	0	0	0.278039	0.353114	0.11767	0.105356	1.7066	0.1	0.0635494
			kg CH4	0.0029164	0.00340402	0.00376129	0.000487613	0	0.0029164	0	0	0	0	0	2.6281e-05	0.0034303	0	0
			kg N2O	0.0025157	0.00331446	0.00363696	0.000798754	0.00201893	0.000412064	8.47115e-05	0	0	0	0	2.44998e-06	0.00331691	0	0
Sweden	Conventional indoor	0.6602	kg CO2e	1.48064	2.68959	3.20166
			kg CO2	0.634344	1.58733	1.99127	0.856959	0	0	0	0	0.279349	0.354995	0.09603	0.0987052	1.68604	0.1	0.03
			kg CH4	0.00320365	0.00369386	0.0040791	0.00049021	0	0.00320365	0	0	0	0	0	2.6281e-05	0.00372014	0	0
			kg N2O	0.00247439	0.00327739	0.00359632	0.000803008	0.00202968	0.000355653	8.90538e-05	0	0	0	0	2.44998e-06	0.00327984	0	0
Denmark	Conventional indoor	0.229404	kg CO2e	1.47837	2.6666	3.23129
			kg CO2	0.623133	1.56017	2.01631	0.841007	0	0	0	0	0.274746	0.348387	0.09603	0.0987052	1.65888	0.1	0.08
			kg CH4	0.00219435	0.00267544	0.00296241	0.000481086	0	0.00219435	0	0	0	0	0	2.6281e-05	0.00270172	0	0
			kg N2O	0.00261956	0.00340762	0.00373911	0.00078806	0.0019919	0.000553861	7.37965e-05	0	0	0	0	2.44998e-06	0.00341007	0	0
Rest of Europe	Conventional indoor	0.110396	kg CO2e	1.4795	2.87412	3.68936
			kg CO2	0.628738	1.76977	2.47667	0.848983	0	0	0	0	0.277048	0.351691	0.29205	0.158954	1.92873	0.1	0.23
			kg CH4	0.002699	0.00318465	0.00352076	0.000485648	0	0.002699	0	0	0	0	0	2.6281e-05	0.00321093	0	0
			kg N2O	0.00254697	0.00334251	0.00366771	0.000795534	0.00201079	0.000454757	8.14251e-05	0	0	0	0	2.44998e-06	0.00334496	0	0
EGGS				Per kg with shell	Per kg with shell	Per kg with shell
Average		1	kg CO2e	1.11395	2.15543	2.52644
			kg CO2	0.406916	1.23246	1.51441	0.768953	0	0	0	0	0.198673	0.208244	0.0565917	0	1.23246	0.1	0.04868
			kg CH4	0.00259626	0.00322536	0.00353658	0.000629103	0	0.00259626	0	0	0	0	0	0	0.00322536	0	0
			kg N2O	0.00207637	0.00272923	0.00299258	0.000652861	0.00165017	0.00031976	0.000106442	0	0	0	0	0	0.00272923	0	0
Sweden	Conventional indoor	0.9066	kg CO2e	1.11395	2.14637	2.49602
			kg CO2	0.406916	1.2234	1.48399	0.768953	0	0	0	0	0.198673	0.208244	0.04753	0	1.2234	0.1	0.03
			kg CH4	0.00259626	0.00322536	0.00353658	0.000629103	0	0.00259626	0	0	0	0	0	0	0.00322536	0	0
			kg N2O	0.00207637	0.00272923	0.00299258	0.000652861	0.00165017	0.00031976	0.000106442	0	0	0	0	0	0.00272923	0	0
Rest of Europe	Conventional indoor	0.0934	kg CO2e	1.11395	2.24339	2.8217
			kg CO2	0.406916	1.32042	1.80967	0.768953	0	0	0	0	0.198673	0.208244	0.14455	0	1.32042	0.1	0.23
			kg CH4	0.00259626	0.00322536	0.00353658	0.000629103	0	0.00259626	0	0	0	0	0	0	0.00322536	0	0
			kg N2O	0.00207637	0.00272923	0.00299258	0.000652861	0.00165017	0.00031976	0.000106442	0	0	0	0	0	0.00272923	0	0
BEEF				Per kg carcass weight	Per kg carcass weight	Per kg carcass weight
Average		1.00007	kg CO2e	17.3513	21.6707	23.8022
			kg CO2	-1.03284	2.55703	2.84086	2.12847	0	0	0	0	-1.10846	0.0756208	1.4614	0.433967	2.3848	0.100007	0.106057
			kg CH4	0.424271	0.42573	0.466864	0.00145944	0	0.031997	0	0.392274	0	0	0	8.62356e-05	0.42578	0	0
			kg N2O	0.0132851	0.0155664	0.0170735	0.00228135	0.00576632	0.00671731	0.00080144	0	0	0	0	8.03907e-06	0.0155711	0	0
Sweden	Suckler cows and offsprings	0.229933	kg CO2e	25.9835	30.2973	32.539
			kg CO2	-1.68964	1.72834	1.21337	2.66624	0	0	0	0	-1.77376	0.0841106	0.75175	0.383411	0.976591	0.1	0.03
			kg CH4	0.654592	0.656476	0.719821	0.00188407	0	0.0391528	0	0.615439	0	0	0	0.000103925	0.656476	0	0
			kg N2O	0.0181777	0.0209691	0.0229925	0.00279142	0.00705558	0.0102318	0.000890334	0	0	0	0	9.68808e-06	0.0209691	0	0
	Suckler cows (total emissions for all heads)		kg CO2e	6.53019e+08	7.44496e+08
			kg CO2	-6.20866e+07	7.19401e+06		6.92806e+07	0	0	0	0	-6.25628e+07	476147	0	0	7.19401e+06
			kg CH4	1.69216e+07	1.69587e+07		37124.8	0	1.00033e+06	0	1.59212e+07	0	0	0	0	1.69587e+07
			kg N2O	469034	539283		70248.8	177561	266277	25196.6	0	0	0	0	0	539283
	Replacement heifers suckler system (total emissions for all heads)		kg CO2e	1.92268e+08	2.11045e+08
			kg CO2	-1.33466e+07	657575		1.40042e+07	0	0	0	0	-1.35384e+07	191724	0	0	657575
			kg CH4	4.99117e+06	5.00001e+06		8844.55	0	291514	0	4.69965e+06	0	0	0	0	5.00001e+06
			kg N2O	120521	135526		15005.1	37927	76765	5828.52	0	0	0	0	0	135526
	Heifers in suckler system (total emissions for all heads)		kg CO2e	2.20134e+08	2.45949e+08
			kg CO2	-1.37913e+07	5.28929e+06		1.90806e+07	0	0	0	0	-1.39265e+07	135227	0	0	5.28929e+06
			kg CH4	5.59289e+06	5.60259e+06		9697.69	0	326658	0	5.26623e+06	0	0	0	0	5.60259e+06
			kg N2O	146870	168361		21490.5	54319.2	86019.7	6531.19	0	0	0	0	0	168361
	Young bulls in suckler system (total emissions for all heads)		kg CO2e	2.94845e+08	3.45525e+08
			kg CO2	-1.88266e+06	3.55783e+07		3.7461e+07	0	0	0	0	-5.2468e+06	3.36415e+06	0	0	3.55783e+07
			kg CH4	6.83195e+06	6.87343e+06		41484	0	426122	0	6.40583e+06	0	0	0	0	6.87343e+06
			kg N2O	216248	255873		39625.6	100158	107048	9042.19	0	0	0	0	0	255873
	Bulls in suckler system (total emissions for all heads)		kg CO2e	5.58962e+07	6.21164e+07
			kg CO2	-237216	4.3611e+06		4.59832e+06	0	0	0	0	-651523	414307	0	0	4.3611e+06
			kg CH4	1.34326e+06	1.34837e+06		5106.59	0	83781.7	0	1.25948e+06	0	0	0	0	1.34837e+06
			kg N2O	35109.3	39969.5		4860.11	12284.4	21047.1	1777.82	0	0	0	0	0	39969.5
	Steers in suckler system (total emissions for all heads)		kg CO2e	4.60012e+07	5.26144e+07
			kg CO2	-4.11279e+06	860517		4.97331e+06	0	0	0	0	-4.15444e+06	41644.8	0	0	860517
			kg CH4	1.18263e+06	1.1853e+06		2666.22	0	73763.3	0	1.10887e+06	0	0	0	0	1.1853e+06
			kg N2O	33236.2	38435		5198.85	13140.6	18530.4	1565.24	0	0	0	0	0	38435
	Calves in suckler system (total emissions for all heads)		kg CO2e	6.64555e+06	8.42707e+06
			kg CO2	-56153.8	1.26452e+06		1.32067e+06	0	0	0	0	-187614	131460	0	0	1.26452e+06
			kg CH4	139746	141326		1579.98	0	11085	0	128661	0	0	0	0	141326
			kg N2O	6544.77	7910.97		1366.21	3453.22	2703.73	387.819	0	0	0	0	0	7910.97
	Dairy cows		kg CO2e	6627.47	8678.78
			kg CO2	40.9778	1595.75		1463.82	0	0	0	0	-127.625	168.603	90.9472	110.93
			kg CH4	144.803	146.568		1.76473	0	8.9834	0	135.82	0	0	0	0.030068
			kg N2O	5.58114	7.04603		1.46489	3.70266	1.72629	0.152185	0	0	0	0	0.002803
	Replacement heifers dairy production		kg CO2e	2514.72	3417.74
			kg CO2	-390.135	340.049		520.048	0	0	0	0	-394.572	4.43691	210.137	0
			kg CH4	64.1322	64.3966		0.264342	0	4.89889	0	59.2333	0	0	0	0
			kg N2O	2.43073	2.98056		0.549827	1.38974	0.967529	0.0734613	0	0	0	0	0
	Total dairy cows and replacement heifers		kg CO2e	2.97876e+09	3.93087e+09
			kg CO2	-7.96238e+07	6.5307e+08		6.49373e+08	0	0	0	0	-1.41015e+08	6.13912e+07	8.33208e+07	1.11148e+07
			kg CH4	6.73034e+07	6.79986e+07		695230	0	4.3978e+06	0	6.29056e+07	0	0	0	3012.7
			kg N2O	2.58413e+06	3.24109e+06		656954	1.66051e+06	851417	72198.8	0	0	0	0	280.851
	Allocation to culled dairy cows	0.122823	kg CO2e	7.40763	9.77534	10.8919
			kg CO2	-0.19801	1.62406	1.95362	1.61487	0	0	0	0	-0.350678	0.152669	0.207204	0.0276405	1.65171	0.1	0.03
			kg CH4	0.167371	0.1691	0.185425	0.00172891	0	0.0109365	0	0.156435	0	0	0	7.49203e-06	0.169108	0	0
			kg N2O	0.00642626	0.00805998	0.00883847	0.00163372	0.00412939	0.00211732	0.000179545	0	0	0	0	6.98424e-07	0.00806068	0	0
	Heifers in dairy system	0.01706	kg CO2e	21.6341	24.8646	27.8338
			kg CO2	-1.39568	1.2165	1.89684	1.86044	0	0	0	0	-1.41155	0.0158728	0.75175	0.383411	1.59992	0.1	0.03
			kg CH4	0.554835	0.555781	0.609523	0.000945666	0	0.0423824	0	0.512453	0	0	0	0.000103925	0.555885	0	0
			kg N2O	0.0139778	0.0159447	0.0174939	0.00196697	0.00497171	0.0083705	0.000635545	0	0	0	0	9.68808e-06	0.0159544	0	0
	Young bulls in dairy system	0.0984319	kg CO2e	14.4188	17.9506	20.2527
			kg CO2	-0.0382622	2.71277	3.53748	1.99928	0	0	0	0	-0.0840803	0.0458181	0.75175	0.383411	3.09618	0.1	0.03
			kg CH4	0.340637	0.341549	0.374619	0.000911328	0	0.046801	0	0.293836	0	0	0	0.000103925	0.341653	0	0
			kg N2O	0.00964901	0.0121651	0.0133495	0.00251605	0.00635956	0.00243284	0.000856605	0	0	0	0	9.68808e-06	0.0121747	0	0
	Bulls in dairy system	0.0155299	kg CO2e	18.1018	21.643	24.3013
			kg CO2	-0.0343318	2.72405	3.54985	2.00663	0	0	0	0	-0.0823216	0.0479897	0.75175	0.383411	3.10746	0.1	0.03
			kg CH4	0.440305	0.441235	0.483925	0.000930239	0	0.0604946	0	0.379811	0	0	0	0.000103925	0.441339	0	0
			kg N2O	0.0106232	0.0131439	0.0144228	0.0025207	0.00637132	0.00314468	0.00110724	0	0	0	0	9.68808e-06	0.0131536	0	0
	Steers in dairy system	0.0327955	kg CO2e	17.8211	20.9862	23.5812
			kg CO2	-1.49904	1.06821	1.73423	1.8155	0	0	0	0	-1.51617	0.0171326	0.75175	0.383411	1.45162	0.1	0.03
			kg CH4	0.459247	0.460221	0.504742	0.000973719	0	0.0374143	0	0.421833	0	0	0	0.000103925	0.460325	0	0
			kg N2O	0.0124353	0.0143306	0.015724	0.00189531	0.00479057	0.00704925	0.000595441	0	0	0	0	9.68808e-06	0.0143403	0	0
	Calves in dairy system	0.0134261	kg CO2e	8.07916	10.9434	12.5693
			kg CO2	0.452647	2.78612	3.61791	1.58173	0	0	0	0	0.207979	0.244668	0.75175	0.383411	3.16953	0.1	0.03
			kg CH4	0.168674	0.170997	0.187611	0.00232295	0	0.0252497	0	0.143425	0	0	0	0.000103925	0.171101	0	0
			kg N2O	0.0063476	0.00786352	0.0086329	0.00151592	0.00383163	0.00180355	0.000712414	0	0	0	0	9.68808e-06	0.00787321	0	0
Ireland	Dairy cows		kg CO2e	6.07691e+09	6.97391e+09
			kg CO2	-3.92559e+08	2.6849e+08		5.67889e+08	0	0	0	0	-4.1905e+08	2.6491e+07	9.31596e+07	3.35881e+07	3.02078e+08
			kg CH4	1.45649e+08	1.46145e+08		496071	0	1.22182e+07	0	1.33431e+08	0	0	0	5745.3	1.46151e+08
			kg N2O	5.09196e+06	5.82714e+06		735181	1.85824e+06	2.93905e+06	294665	0	0	0	0	535.589	5.82767e+06
	Replacement heifers dairy production		kg CO2e	1.10095e+09	1.70846e+09
			kg CO2	-7.23424e+07	4.56518e+08		2.3399e+08	0	0	0	0	-8.48625e+07	1.25201e+07	2.9487e+08	0	4.56518e+08
			kg CH4	2.30874e+07	2.32675e+07		180119	0	1.62467e+06	0	2.14627e+07	0	0	0	0	2.32675e+07
			kg N2O	1.30307e+06	1.54645e+06		243375	615154	628286	59633.9	0	0	0	0	0	1.54645e+06
	Total dairy cows and replacement heifers		kg CO2e	7.17785e+09	8.68236e+09
			kg CO2	-4.64901e+08	7.25008e+08		8.01879e+08	0	0	0	0	-5.03912e+08	3.9011e+07	3.8803e+08	3.35881e+07	7.58596e+08
			kg CH4	1.68736e+08	1.69412e+08		676190	0	1.38429e+07	0	1.54893e+08	0	0	0	5745.3	1.69418e+08
			kg N2O	6.39503e+06	7.37359e+06		978556	2.47339e+06	3.56734e+06	354299	0	0	0	0	535.589	7.37412e+06
	Allocation to culled dairy cows	0.0131129	kg CO2e	9.36013	11.3221	12.7153
			kg CO2	-0.606245	0.945431	1.33688	1.04567	0	0	0	0	-0.657116	0.0508715	0.506002	0.0437998	0.989231	0.1	0.13
			kg CH4	0.220037	0.220919	0.242244	0.000881772	0	0.0180515	0	0.201986	0	0	0	7.49203e-06	0.220926	0	0
			kg N2O	0.00833931	0.00961537	0.0105439	0.00127607	0.00322538	0.00465191	0.000462016	0	0	0	0	6.98424e-07	0.00961607	0	0
	Suckler cows and offsprings	0.119284	kg CO2e	20.7915	26.5268	26.8317
			kg CO2	-1.67794	3.22173	1.27794	2.61342	0	0	0	0	-1.75745	0.0795135	2.28625	0.607562	0.935481	0.1	0.13
			kg CH4	0.484227	0.486024	0.532921	0.00179714	0	0.033328	0	0.450899	0	0	0	0.000103925	0.486024	0	0
			kg N2O	0.0201533	0.0227525	0.0249479	0.00259915	0.00656961	0.0125092	0.00107455	0	0	0	0	9.68808e-06	0.0227525	0	0
	Suckler cows (total emissions for all heads)		kg CO2e	3.69739e+09	4.10602e+09
			kg CO2	-3.43345e+08	-2.90575e+07		3.14287e+08	0	0	0	0	-3.43345e+08	0	0	0	-2.90575e+07
			kg CH4	9.25212e+07	9.26828e+07		161584	0	7.5162e+06	0	8.5005e+07	0	0	0	0	9.26828e+07
			kg N2O	3.00342e+06	3.30157e+06		298150	753602	2.04715e+06	202661	0	0	0	0	0	3.30157e+06
	Replacement heifers suckler system (total emissions for all heads)		kg CO2e	9.3792e+08	1.06685e+09
			kg CO2	-3.05387e+07	6.58449e+07		9.63836e+07	0	0	0	0	-3.52343e+07	4.69558e+06	0	0	6.58449e+07
			kg CH4	2.0527e+07	2.06022e+07		75182.6	0	1.55454e+06	0	1.89725e+07	0	0	0	0	2.06022e+07
			kg N2O	907851	1.00849e+06		100642	254383	590682	62785.8	0	0	0	0	0	1.00849e+06
	Heifers in suckler system (total emissions for all heads)		kg CO2e	2.21957e+09	2.58383e+09
			kg CO2	-8.62794e+07	1.86028e+08		2.72307e+08	0	0	0	0	-9.95456e+07	1.32662e+07	0	0	1.86028e+08
			kg CH4	4.80355e+07	4.82479e+07		212409	0	3.36717e+06	0	4.46683e+07	0	0	0	0	4.82479e+07
			kg N2O	2.2572e+06	2.54154e+06		284339	718695	1.39068e+06	147821	0	0	0	0	0	2.54154e+06
	Bulls in suckler system (total emissions for all heads)		kg CO2e	1.31502e+09	1.54051e+09
			kg CO2	-6.3808e+07	1.04554e+08		1.68362e+08	0	0	0	0	-7.00116e+07	6.2036e+06	0	0	1.04554e+08
			kg CH4	2.94627e+07	2.9578e+07		115329	0	2.61952e+06	0	2.68431e+07	0	0	0	0	2.9578e+07
			kg N2O	1.26542e+06	1.44396e+06		178538	451272	703719	110430	0	0	0	0	0	1.44396e+06
	Bullocks in suckler system (total emissions for all heads)		kg CO2e	2.27709e+09	2.88219e+09
			kg CO2	-3.19787e+08	1.41587e+08		4.61375e+08	0	0	0	0	-3.35454e+08	1.56666e+07	0	0	1.41587e+08
			kg CH4	5.27711e+07	5.31085e+07		337403	0	1.67781e+06	0	5.10933e+07	0	0	0	0	5.31085e+07
			kg N2O	2.69348e+06	3.1373e+06		443817	1.12179e+06	1.55561e+06	16078.6	0	0	0	0	0	3.1373e+06
	Calves in suckler system (total emissions for all heads)		kg CO2e	8.91498e+06	1.10152e+07
			kg CO2	-66199.9	1.49075e+06		1.55695e+06	0	0	0	0	-221179	154979	0	0	1.49075e+06
			kg CH4	197365	199227		1862.64	0	25196	0	172169	0	0	0	0	199227
			kg N2O	7620.08	9230.71		1610.63	4071.01	2943.07	605.999	0	0	0	0	0	9230.71
Germany and Poland	Dairy cows		kg CO2e	6596.26	8854.19
			kg CO2	43.8434	1793.31		1472.87	0	0	0	0	-123.872	167.715	276.592	182.876
			kg CH4	142.069	143.833		1.76399	0	6.56878	0	135.5	0	0	0	0.030068
			kg N2O	5.77877	7.28377		1.505	3.80403	1.29134	0.683402	0	0	0	0	0.002803
	Replacement heifers dairy production		kg CO2e	1824.72	3254.72
			kg CO2	-414.4	816.21		553.88	0	0	0	0	-418.837	4.43691	676.73	0
			kg CH4	45.5275	45.8163		0.288718	0	2.22753	0	43.3	0	0	0	0
			kg N2O	2.31941	2.95555		0.636138	1.6079	0.465275	0.246233	0	0	0	0	0
	Total dairy cows and replacement heifers		kg CO2e	3.46535e+10	4.89644e+10
			kg CO2	-1.06654e+09	1.03945e+10		8.18301e+09	0	0	0	0	-1.82006e+09	7.53521e+08	3.27805e+09	2.30534e+08	1.06251e+10
			kg CH4	7.65294e+08	7.73956e+08		8.66131e+06	0	3.57571e+07	0	7.29537e+08	0	0	0	37903.7	7.73994e+08
			kg N2O	3.25506e+07	4.11255e+07		8.57488e+06	2.16738e+07	7.11262e+06	3.76413e+06	0	0	0	0	3533.46	4.1129e+07
	Allocation to culled dairy cows	0.0474306	kg CO2e	6.58394	9.3029	10.5013
			kg CO2	-0.202635	1.97489	2.46567	1.55472	0	0	0	0	-0.345798	0.143164	0.622807	0.0437998	2.01869	0.1	0.13
			kg CH4	0.145401	0.147046	0.161243	0.00164559	0	0.0067936	0	0.138607	0	0	0	7.20144e-06	0.147053	0	0
			kg N2O	0.00618439	0.00781356	0.00856823	0.00162917	0.00411788	0.00135135	0.000715159	0	0	0	0	6.71334e-07	0.00781423	0	0
	Heifers	0.0180858	kg CO2e	14.5879	19.4189	22.2181
			kg CO2	-1.4	2.75747	3.94192	1.87122	0	0	0	0	-1.41499	0.0149896	2.28625	0.607562	3.36503	0.1	0.13
			kg CH4	0.371706	0.372681	0.408755	0.000975397	0	0.0181865	0	0.353519	0	0	0	0.000103925	0.372785	0	0
			kg N2O	0.0112411	0.0133903	0.0146929	0.00214912	0.0054321	0.0037987	0.00201034	0	0	0	0	9.68808e-06	0.0133999	0	0
	Bulls	0.0679394	kg CO2e	9.92688	15.0018	17.3748
			kg CO2	-0.0368249	4.25506	5.58402	2.00564	0	0	0	0	-0.0832847	0.0464598	2.28625	0.607562	4.86263	0.1	0.13
			kg CH4	0.210276	0.211194	0.231686	0.000917919	0	0.021358	0	0.188918	0	0	0	0.000103925	0.211298	0	0
			kg N2O	0.00944403	0.011967	0.0131323	0.00252294	0.00637698	0.00181632	0.00125072	0	0	0	0	9.68808e-06	0.0119767	0	0
	Calves	0.00582731	kg CO2e	10.2041	14.5934	16.927
			kg CO2	0.449145	4.3096	5.64381	1.5742	0	0	0	0	0.207132	0.242014	2.28625	0.607562	4.91716	0.1	0.13
			kg CH4	0.224686	0.226986	0.249002	0.00229983	0	0.0228217	0	0.201865	0	0	0	0.000103925	0.22709	0	0
			kg N2O	0.00709951	0.00861173	0.0094533	0.00151222	0.00382227	0.0019408	0.00133644	0	0	0	0	9.68808e-06	0.00862141	0	0
Rest of Europe	Beef from extensive dairy production**	0.152349	kg CO2e	17.8211	22.5207	25.7288
			kg CO2	-1.49904	2.60271	3.88188	1.8155	0	0	0	0	-1.51617	0.0171326	2.28625	0.607562	3.21027	0.1	0.23
			kg CH4	0.459247	0.460221	0.504742	0.000973719	0	0.0374143	0	0.421833	0	0	0	0.000103925	0.460325	0	0
			kg N2O	0.0124353	0.0143306	0.015724	0.00189531	0.00479057	0.00704925	0.000595441	0	0	0	0	9.68808e-06	0.0143403	0	0
Rest of the world	Extensive suckler cows and offsprings***	0.0460416	kg CO2e	23.3875	32.5978	37.5452
			kg CO2	-1.68379	6.66081	9.09839	2.63983	0	0	0	0	-1.7656	0.0818121	5.70477	1.10692	7.76773	0.1	0.43
			kg CH4	0.56941	0.57125	0.626485	0.0018406	0	0.0362404	0	0.533169	0	0	0	0.000103925	0.571354	0	0
			kg N2O	0.0191655	0.0218608	0.0239808	0.00269529	0.00681259	0.0113705	0.00098244	0	0	0	0	9.68808e-06	0.0218705	0	0

## Sheet: Dairy products
Results dairy products			Choice of climate metric:	GWP100 with fb
			Include land use change?	Yes
			Include soil carbon changes? Go to: "Common input data" --> "Choose factors for soil carbon changes"	Yes
			RESULTS			Feed production		Manure management
	Market share	Emissions	Agricultural emissions only	To farm-gate	To retail-gate	Energy use and mineral fertilizer production	Soil emissions	Direct emissions	Indirect emissions	Enteric fermentation	Soil carbon emissions	LUC emissions	Energy use in stables	Energy use at slaughter	Energy use dairy plant	Total after processing	Packaging	Transportation
MILK DELIVERED TO DAIRY PLANTS			Per kg milk	Per kg milk
Sweden and Nordic countries		kg CO2e	0.928974	1.22943
		kg CO2	-0.0248319	0.207136		0.202517	0	0	0	0	-0.0439778	0.0191458	0.0259849	0.00346634	0	0.207136
		kg CH4	0.0209896	0.0212074		0.000216818	0	0.00137152	0	0.0196181	0	0	0	9.39558e-07	0	0.0212074
		kg N2O	0.000805902	0.00101087		0.000204881	0.000517858	0.000265528	2.25163e-05	0	0	0	0	8.75877e-08	0	0.00101087
Rest of Europe		kg CO2e	0.928974	1.28966
		kg CO2	-0.0248319	0.267253		0.202517	0	0	0	0	-0.0439778	0.0191458	0.0790263	0.010542	0	0.267253
		kg CH4	0.0209896	0.0212093		0.000216818	0	0.00137152	0	0.0196181	0	0	0	2.85742e-06	0	0.0212093
		kg N2O	0.000805902	0.00101105		0.000204881	0.000517858	0.000265528	2.25163e-05	0	0	0	0	2.66375e-07	0	0.00101105
PASTEURIZED MILK (3% FAT)			Per kg pasteurized milk	Per kg pasteurized milk	Per kg pasteurized milk
Sweden	1	kg CO2e	0.928974	1.22943	1.36935
		kg CO2	-0.0248319	0.207136	0.324222	0.202517	0	0	0	0	-0.0439778	0.0191458	0.0259849	0.00346634	0.03	0.237136	0.05	0.03
		kg CH4	0.0209896	0.0212074	0.0216812	0.000216818	0	0.00137152	0	0.0196181	0	0	0	9.39558e-07	0	0.0212074	0	0
		kg N2O	0.000805902	0.00101087	0.00103346	0.000204881	0.000517858	0.000265528	2.25163e-05	0	0	0	0	8.75877e-08	0	0.00101087	0	0
BUTTER (82% FAT)			Per kg butter	Per kg butter	Per kg butter
Average	1	kg CO2e	9.1411	12.2042	12.6671
		kg CO2	-0.244346	2.1447	2.38274	1.99277	0	0	0	0	-0.432741	0.188395	0.349638	0.0466411	0.06096	2.20566	0.05	0.075
		kg CH4	0.206538	0.208684	0.213347	0.00213349	0	0.0134958	0	0.193042	0	0	0	1.26422e-05	0	0.208684	0	0
		kg N2O	0.00793008	0.00994729	0.0101695	0.00201603	0.00509572	0.00261279	0.000221561	0	0	0	0	1.17853e-06	0	0.00994729	0	0
Sweden	0.64	kg CO2e	9.1411	12.0976	12.4987
		kg CO2	-0.244346	2.03822	2.21462	1.99277	0	0	0	0	-0.432741	0.188395	0.255692	0.0341087	0.048	2.08622	0.05	0.03
		kg CH4	0.206538	0.208681	0.213343	0.00213349	0	0.0134958	0	0.193042	0	0	0	9.24526e-06	0	0.208681	0	0
		kg N2O	0.00793008	0.00994697	0.0101692	0.00201603	0.00509572	0.00261279	0.000221561	0	0	0	0	8.61863e-07	0	0.00994697	0	0
Denmark	0.18	kg CO2e	9.1411	12.0976	12.5498
		kg CO2	-0.244346	2.03822	2.26574	1.99277	0	0	0	0	-0.432741	0.188395	0.255692	0.0341087	0.048	2.08622	0.05	0.08
		kg CH4	0.206538	0.208681	0.213343	0.00213349	0	0.0134958	0	0.193042	0	0	0	9.24526e-06	0	0.208681	0	0
		kg N2O	0.00793008	0.00994697	0.0101692	0.00201603	0.00509572	0.00261279	0.000221561	0	0	0	0	8.61863e-07	0	0.00994697	0	0
Rest of Europe	0.18	kg CO2e	9.1411	12.6903	13.3828
		kg CO2	-0.244346	2.62977	3.09747	1.99277	0	0	0	0	-0.432741	0.188395	0.777619	0.103733	0.12	2.74977	0.05	0.23
		kg CH4	0.206538	0.208699	0.213363	0.00213349	0	0.0134958	0	0.193042	0	0	0	2.8117e-05	0	0.208699	0	0
		kg N2O	0.00793008	0.00994873	0.010171	0.00201603	0.00509572	0.00261279	0.000221561	0	0	0	0	2.62113e-06	0	0.00994873	0	0
YOGURT (3% FAT)			Per kg yogurt	Per kg yogurt	Per kg yogurt
Average	1	kg CO2e	0.928974	1.2434	1.53822
		kg CO2	-0.0248319	0.221084	0.49306	0.202517	0	0	0	0	-0.0439778	0.0191458	0.0382905	0.00510788	0.1348	0.355884	0.05	0.0764
		kg CH4	0.0209896	0.0212078	0.0216817	0.000216818	0	0.00137152	0	0.0196181	0	0	0	1.3845e-06	0	0.0212078	0	0
		kg N2O	0.000805902	0.00101091	0.0010335	0.000204881	0.000517858	0.000265528	2.25163e-05	0	0	0	0	1.29066e-07	0	0.00101091	0	0
Sweden	0.768	kg CO2e	0.928974	1.22943	1.44092
		kg CO2	-0.0248319	0.207136	0.395787	0.202517	0	0	0	0	-0.0439778	0.0191458	0.0259849	0.00346634	0.1	0.307136	0.05	0.03
		kg CH4	0.0209896	0.0212074	0.0216812	0.000216818	0	0.00137152	0	0.0196181	0	0	0	9.39558e-07	0	0.0212074	0	0
		kg N2O	0.000805902	0.00101087	0.00103346	0.000204881	0.000517858	0.000265528	2.25163e-05	0	0	0	0	8.75877e-08	0	0.00101087	0	0
Rest of Europe	0.232	kg CO2e	0.928974	1.28966	1.86032
		kg CO2	-0.0248319	0.267253	0.815067	0.202517	0	0	0	0	-0.0439778	0.0191458	0.0790263	0.010542	0.25	0.517253	0.05	0.23
		kg CH4	0.0209896	0.0212093	0.0216832	0.000216818	0	0.00137152	0	0.0196181	0	0	0	2.85742e-06	0	0.0212093	0	0
		kg N2O	0.000805902	0.00101105	0.00103364	0.000204881	0.000517858	0.000265528	2.25163e-05	0	0	0	0	2.66375e-07	0	0.00101105	0	0
CREAM (40% FAT)			Per kg cream	Per kg cream	Per kg cream
Average	1	kg CO2e	4.64487	6.20014	6.46937
		kg CO2	-0.12416	1.08859	1.2436	1.01259	0	0	0	0	-0.219889	0.0957291	0.176601	0.0235582	0.01264	1.10123	0.05	0.0652
		kg CH4	0.104948	0.106039	0.108408	0.0001908	0	0.00120694	0	0.0172639	0	0	0	2.51453e-06	0	0.106039	0	0
		kg N2O	0.00402951	0.00505451	0.00516745	0.000180296	0.000455715	0.000233665	1.98144e-05	0	0	0	0	2.3441e-07	0	0.00505451	0	0
Sweden	0.824	kg CO2e	4.64487	6.14713	6.37649
		kg CO2	-0.12416	1.03568	1.15083	1.01259	0	0	0	0	-0.219889	0.0957291	0.129925	0.0173317	0.01	1.04568	0.05	0.03
		kg CH4	0.104948	0.106037	0.108406	0.00108409	0	0.00685761	0	0.0980905	0	0	0	4.69779e-06	0	0.106037	0	0
		kg N2O	0.00402951	0.00505436	0.00516729	0.00102441	0.00258929	0.00132764	0.000112582	0	0	0	0	4.37939e-07	0	0.00505436	0	0
Rest of Europe	0.176	kg CO2e	4.64487	6.44831	6.90421
		kg CO2	-0.12416	1.33627	1.67794	1.01259	0	0	0	0	-0.219889	0.0957291	0.395131	0.0527098	0.025	1.36127	0.05	0.23
		kg CH4	0.104948	0.106046	0.108416	0.00108409	0	0.00685761	0	0.0980905	0	0	0	1.42871e-05	0	0.106046	0	0
		kg N2O	0.00402951	0.00505525	0.0051682	0.00102441	0.00258929	0.00132764	0.000112582	0	0	0	0	1.33188e-06	0	0.00505525	0	0
HARD CHEESE (38% FAT)			Per kg hard cheese	Per kg hard cheese	Per kg hard cheese
Average	1	kg CO2e	8.73235	11.7423	12.5649
		kg CO2	-0.23342	2.13244	2.74025	1.90366	0	0	0	0	-0.413391	0.179971	0.407795	0.0543991	0.405328	2.53776	0.05	0.0926
		kg CH4	0.197302	0.199355	0.20381	0.00203809	0	0.0128923	0	0.18441	0	0	0	1.4745e-05	0	0.199355	0	0
		kg N2O	0.00757548	0.00950274	0.00971506	0.00192589	0.00486786	0.00249596	0.000211654	0	0	0	0	1.37456e-06	0	0.00950274	0	0
Sweden	0.512	kg CO2e	8.73235	11.5566	12.1849
		kg CO2	-0.23342	1.94708	2.36068	1.90366	0	0	0	0	-0.413391	0.179971	0.244258	0.0325836	0.282	2.22908	0.05	0.03
		kg CH4	0.197302	0.199349	0.203804	0.00203809	0	0.0128923	0	0.18441	0	0	0	8.83185e-06	0	0.199349	0	0
		kg N2O	0.00757548	0.00950219	0.0097145	0.00192589	0.00486786	0.00249596	0.000211654	0	0	0	0	8.23325e-07	0	0.00950219	0	0
Denmark	0.16	kg CO2e	8.73235	11.5566	12.236
		kg CO2	-0.23342	1.94708	2.41179	1.90366	0	0	0	0	-0.413391	0.179971	0.244258	0.0325836	0.282	2.22908	0.05	0.08
		kg CH4	0.197302	0.199349	0.203804	0.00203809	0	0.0128923	0	0.18441	0	0	0	8.83185e-06	0	0.199349	0	0
		kg N2O	0.00757548	0.00950219	0.0097145	0.00192589	0.00486786	0.00249596	0.000211654	0	0	0	0	8.23325e-07	0	0.00950219	0	0
The Netherlands	0.11	kg CO2e	8.73235	12.1228	13.2504
		kg CO2	-0.23342	2.51218	3.42504	1.90366	0	0	0	0	-0.413391	0.179971	0.742847	0.0990943	0.658	3.17018	0.05	0.13
		kg CH4	0.197302	0.199367	0.203822	0.00203809	0	0.0128923	0	0.18441	0	0	0	2.68597e-05	0	0.199367	0	0
		kg N2O	0.00757548	0.00950387	0.00971622	0.00192589	0.00486786	0.00249596	0.000211654	0	0	0	0	2.50393e-06	0	0.00950387	0	0
Rest of Europe	0.218	kg CO2e	8.73235	12.1228	13.3527
		kg CO2	-0.23342	2.51218	3.52727	1.90366	0	0	0	0	-0.413391	0.179971	0.742847	0.0990943	0.658	3.17018	0.05	0.23
		kg CH4	0.197302	0.199367	0.203822	0.00203809	0	0.0128923	0	0.18441	0	0	0	2.68597e-05	0	0.199367	0	0
		kg N2O	0.00757548	0.00950387	0.00971622	0.00192589	0.00486786	0.00249596	0.000211654	0	0	0	0	2.50393e-06	0	0.00950387	0	0
DESSERT CHEESE (25% FAT)			Per kg dessert cheese	Per kg dessert cheese	Per kg dessert cheese
Average	1	kg CO2e	5.67603	7.63252	8.36322
		kg CO2	-0.151723	1.38608	1.97722	1.23738	0	0	0	0	-0.268704	0.116981	0.265067	0.0353594	0.405328	1.79141	0.05	0.0926
		kg CH4	0.128247	0.129581	0.132476	0.00132476	0	0.00838	0	0.119867	0	0	0	9.58425e-06	0	0.129581	0	0
		kg N2O	0.00492406	0.00617678	0.00631479	0.00125183	0.00316411	0.00162238	0.000137575	0	0	0	0	8.93465e-07	0	0.00617678	0	0
Sweden	0.512	kg CO2e	5.67603	7.5118	8.04973
		kg CO2	-0.151723	1.2656	1.66397	1.23738	0	0	0	0	-0.268704	0.116981	0.158768	0.0211793	0.282	1.5476	0.05	0.03
		kg CH4	0.128247	0.129577	0.132472	0.00132476	0	0.00838	0	0.119867	0	0	0	5.7407e-06	0	0.129577	0	0
		kg N2O	0.00492406	0.00617642	0.00631443	0.00125183	0.00316411	0.00162238	0.000137575	0	0	0	0	5.35161e-07	0	0.00617642	0	0
Denmark	0.16	kg CO2e	5.67603	7.5118	8.10084
		kg CO2	-0.151723	1.2656	1.71509	1.23738	0	0	0	0	-0.268704	0.116981	0.158768	0.0211793	0.282	1.5476	0.05	0.08
		kg CH4	0.128247	0.129577	0.132472	0.00132476	0	0.00838	0	0.119867	0	0	0	5.7407e-06	0	0.129577	0	0
		kg N2O	0.00492406	0.00617642	0.00631443	0.00125183	0.00316411	0.00162238	0.000137575	0	0	0	0	5.35161e-07	0	0.00617642	0	0
The Netherlands	0.11	kg CO2e	5.67603	7.87984	8.91263
		kg CO2	-0.151723	1.63292	2.52613	1.23738	0	0	0	0	-0.268704	0.116981	0.482851	0.0644113	0.658	2.29092	0.05	0.13
		kg CH4	0.128247	0.129589	0.132484	0.00132476	0	0.00838	0	0.119867	0	0	0	1.74588e-05	0	0.129589	0	0
		kg N2O	0.00492406	0.00617751	0.00631554	0.00125183	0.00316411	0.00162238	0.000137575	0	0	0	0	1.62755e-06	0	0.00617751	0	0
Rest of Europe	0.218	kg CO2e	5.67603	7.87984	9.01486
		kg CO2	-0.151723	1.63292	2.62836	1.23738	0	0	0	0	-0.268704	0.116981	0.482851	0.0644113	0.658	2.29092	0.05	0.23
		kg CH4	0.128247	0.129589	0.132484	0.00132476	0	0.00838	0	0.119867	0	0	0	1.74588e-05	0	0.129589	0	0
		kg N2O	0.00492406	0.00617751	0.00631554	0.00125183	0.00316411	0.00162238	0.000137575	0	0	0	0	1.62755e-06	0	0.00617751	0	0
CRÈME FRAICHE (34% FAT)			Per kg crème fraiche	Per kg crème fraiche	Per kg crème fraiche
Average	1	kg CO2e	4.0271	5.39015	5.71009
		kg CO2	-0.107646	0.958397	1.17932	0.877912	0	0	0	0	-0.190644	0.0829971	0.165989	0.0221427	0.068748	1.02715	0.05	0.0764
		kg CH4	0.09099	0.0919359	0.0939901	0.000939908	0	0.00594555	0	0.0850445	0	0	0	6.00182e-06	0	0.0919359	0	0
		kg N2O	0.00349359	0.00438231	0.00448022	0.000888161	0.00224491	0.00115106	9.76083e-05	0	0	0	0	5.59503e-07	0	0.00438231	0	0
Sweden	0.768	kg CO2e	4.0271	5.32957	5.58257
		kg CO2	-0.107646	0.897937	1.05193	0.877912	0	0	0	0	-0.190644	0.0829971	0.112645	0.0150266	0.051	0.948937	0.05	0.03
		kg CH4	0.09099	0.091934	0.0939881	0.000939908	0	0.00594555	0	0.0850445	0	0	0	4.07299e-06	0	0.091934	0	0
		kg N2O	0.00349359	0.00438213	0.00448004	0.000888161	0.00224491	0.00115106	9.76083e-05	0	0	0	0	3.79693e-07	0	0.00438213	0	0
Rest of Europe	0.232	kg CO2e	4.0271	5.59069	6.13221
		kg CO2	-0.107646	1.15854	1.60103	0.877912	0	0	0	0	-0.190644	0.0829971	0.342579	0.0456994	0.1275	1.28604	0.05	0.23
		kg CH4	0.09099	0.0919423	0.0939966	0.000939908	0	0.00594555	0	0.0850445	0	0	0	1.23869e-05	0	0.0919423	0	0
		kg N2O	0.00349359	0.0043829	0.00448083	0.000888161	0.00224491	0.00115106	9.76083e-05	0	0	0	0	1.15474e-06	0	0.0043829	0	0
MILK POWDER			Per kg milk powder	Per kg milk powder	Per kg milk powder
Average	1	kg CO2e	8.36077	11.1516	11.7851
		kg CO2	-0.223487	1.9508	2.37879	1.82265	0	0	0	0	-0.3958	0.172312	0.310244	0.0413859	0.264	2.2148	0.05	0.062
		kg CH4	0.188907	0.190869	0.195134	0.00195137	0	0.0123437	0	0.176563	0	0	0	1.12177e-05	0	0.190869	0	0
		kg N2O	0.00725312	0.0090981	0.00930138	0.00184393	0.00466072	0.00238975	0.000202647	0	0	0	0	1.04574e-06	0	0.0090981	0	0
Sweden	0.84	kg CO2e	8.36077	11.0648	11.5983
		kg CO2	-0.223487	1.86423	2.19214	1.82265	0	0	0	0	-0.3958	0.172312	0.233864	0.031197	0.2	2.06423	0.05	0.03
		kg CH4	0.188907	0.190866	0.195131	0.00195137	0	0.0123437	0	0.176563	0	0	0	8.45603e-06	0	0.190866	0	0
		kg N2O	0.00725312	0.00909784	0.00930112	0.00184393	0.00466072	0.00238975	0.000202647	0	0	0	0	7.8829e-07	0	0.00909784	0	0
Rest of Europe	0.16	kg CO2e	8.36077	11.607	12.766
		kg CO2	-0.223487	2.40528	3.35869	1.82265	0	0	0	0	-0.3958	0.172312	0.711237	0.0948776	0.6	3.00528	0.05	0.23
		kg CH4	0.188907	0.190884	0.195149	0.00195137	0	0.0123437	0	0.176563	0	0	0	2.57168e-05	0	0.190884	0	0
		kg N2O	0.00725312	0.00909945	0.00930276	0.00184393	0.00466072	0.00238975	0.000202647	0	0	0	0	2.39738e-06	0	0.00909945	0	0

## Sheet: Fish and seafood
Results fish and seafood				Choice of climate metric:	GWP100 with fb
				Include land use change?	Yes
				Include soil carbon changes? Go to: "Common input data" --> "Choose factors for soil carbon changes"	Yes
				RESULTS				Production of feed
	Production system	Gear use fraction	Emissions	Agricultural emissions only	To farm-gate (before processing of fish)	To retail-gate	Production of fry and fingerlings	Energy use and mineral fertilizer production	Soil emissions	Soil carbon emissions	LUC emissions	Production of capital goods	Energy use for aquaculture	Diesel use at vessels	Storage at vessels	Energy use for processing	Total after processing	Packaging	Transportation
AVERAGE OF FISH AND SEAFOOD ON THE SWEDISH MARKET				Per kg live weight	Per kg live weight	Per kg edible weight
			kg CO2e	0.535653	2.38974	6.0981
			kg CO2	0.173869	1.68529	4.54995	0.0367333	0.49761	0	0.0586937	0.115175	0.0156	0.0446	0.916879	0	0.100966	3.58997	0.146	0.118373
			kg CH4	0	0.000520032	0.00130524	0	0.000113886	0	0	0	0	0	0.000406147	0	0	0.00110898	0	0
			kg N2O	0.00121404	0.00171899	0.00347858	0	0.000480314	0.00121404	0	0	0	0	2.46369e-05	0	0	0.00293183	0	0
			kg HCFC-22	0	8.28625e-05	0.000221823	0	0	0	0	0	0	0	0	8.28625e-05	0	0.000188799	0	0
SALMON				Per kg live weight	Per kg live weight	Per kg edible weight
Norway	Farmed	1	kg CO2e	1.25562	3.02886	6.06523
			kg CO2	0.39286	1.81553	3.76593	0.09	1.18667	0	0.139566	0.253294	0.036	0.11	0	0	0.06014	3.02527	0.1	0.08
			kg CH4	0	0.000271587	0.000514666	0	0.000271587	0	0	0	0	0	0	0	0	0.000438044	0	0
			kg N2O	0.00289517	0.00404059	0.00765704	0	0.00114542	0.00289517	0	0	0	0	0	0	0	0.00651708	0	0
			kg HCFC-22	0	0	0	0	0	0	0	0	0	0	0	0	0	0	0	0
COD				Per kg live weight	Per kg live weight	Per kg edible weight
Average		1	kg CO2e	0	2.51844	7.29341
			kg CO2	0	1.96761	5.83993	0	0	0	0	0	0	0	1.96761	0	0.136035	4.7245	0.1	0.146
			kg CH4	0	0.000871585	0.00229986	0	0	0	0	0	0	0	0.000871585	0	0	0.00195746	0	0
			kg N2O	0	5.28705e-05	0.00013951	0	0	0	0	0	0	0	5.28705e-05	0	0	0.00011874	0	0
			kg HCFC-22	0	0.00024	0.000633289	0	0	0	0	0	0	0	0	0.00024	0	0.000539007	0	0
Norway, Denmark, Sweden	Wild-caught with bottom trawl	0.5	kg CO2e	0	3.17844	9.03495
			kg CO2	0	2.61273	7.54221	0	0	0	0	0	0	0	2.61273	0	0.136035	6.17335	0.1	0.146
			kg CH4	0	0.00115735	0.00305391	0	0	0	0	0	0	0	0.00115735	0	0	0.00259925	0	0
			kg N2O	0	7.0205e-05	0.00018525	0	0	0	0	0	0	0	7.0205e-05	0	0	0.000157671	0	0
			kg HCFC-22	0	0.00024	0.000633289	0	0	0	0	0	0	0	0	0.00024	0	0.000539007	0	0
Norway, Denmark, Sweden	Wild-caught with autoline	0.5	kg CO2e	0	1.85844	5.55186
			kg CO2	0	1.32249	4.13766	0	0	0	0	0	0	0	1.32249	0	0.136035	3.27565	0.1	0.146
			kg CH4	0	0.00058582	0.00154581	0	0	0	0	0	0	0	0.00058582	0	0	0.00131567	0	0
			kg N2O	0	3.55359e-05	9.37687e-05	0	0	0	0	0	0	0	3.55359e-05	0	0	7.98087e-05	0	0
			kg HCFC-22	0	0.00024	0.000633289	0	0	0	0	0	0	0	0	0.00024	0	0.000539007	0	0
ROE (FROM COD FISH)						Per kg edible weight
Average		1	kg CO2e			2.00586											Per kg roe
			kg CO2			1.68228											1.05182	0.3	0.08
			kg CH4			0.000512021											0.000435793	0	0
			kg N2O			3.10592e-05											2.64352e-05	0	0
			kg HCFC-22			0.00014099											0.00012	0	0
Norway and Iceland	Wild-caught with bottom trawl	0.5	kg CO2e			2.39359
			kg CO2			2.06126											1.37438	0.3	0.08
			kg CH4			0.000679896											0.000578675	0	0
			kg N2O			4.12426e-05											3.51025e-05	0	0
			kg HCFC-22			0.00014099											0.00012	0	0
Norway and Iceland	Wild-caught with autoline	0.5	kg CO2e			1.61814
			kg CO2			1.30329											0.729264	0.3	0.08
			kg CH4			0.000344145											0.00029291	0	0
			kg N2O			2.08759e-05											1.77679e-05	0	0
			kg HCFC-22			0.00014099											0.00012	0	0
HERRING				Per kg live weight	Per kg live weight	Per kg edible weight
Average		1	kg CO2e	0	0.328938	1.13712
			kg CO2	0	0.274175	1.03165	0	0	0	0	0	0	0	0.274175	0	0.06014	0.548058	0.3	0.03
			kg CH4	0	0.00012145	0.000233925	0	0	0	0	0	0	0	0.00012145	0	0	0.000199099	0	0
			kg N2O	0	7.3672e-06	1.41899e-05	0	0	0	0	0	0	0	7.3672e-06	0	0	1.20774e-05	0	0
			kg HCFC-22	0	2.3e-05	4.43002e-05	0	0	0	0	0	0	0	0	2.3e-05	0	3.77049e-05	0	0
Sweden	Wild-caught with bottom trawl	0.5	kg CO2e	0	0.444438	1.35959
			kg CO2	0	0.387071	1.24909	0	0	0	0	0	0	0	0.387071	0	0.06014	0.733133	0.3	0.03
			kg CH4	0	0.000171459	0.000330247	0	0	0	0	0	0	0	0.000171459	0	0	0.000281081	0	0
			kg N2O	0	1.04007e-05	2.00328e-05	0	0	0	0	0	0	0	1.04007e-05	0	0	1.70504e-05	0	0
			kg HCFC-22	0	2.3e-05	4.43002e-05	0	0	0	0	0	0	0	0	2.3e-05	0	3.77049e-05	0	0
Sweden	Wild-caught with autoline	0.5	kg CO2e	0	0.213438	0.91466
			kg CO2	0	0.16128	0.814198	0	0	0	0	0	0	0	0.16128	0	0.06014	0.362983	0.3	0.03
			kg CH4	0	7.14414e-05	0.000137603	0	0	0	0	0	0	0	7.14414e-05	0	0	0.000117117	0	0
			kg N2O	0	4.33364e-06	8.34701e-06	0	0	0	0	0	0	0	4.33364e-06	0	0	7.10434e-06	0	0
			kg HCFC-22	0	2.3e-05	4.43002e-05	0	0	0	0	0	0	0	0	2.3e-05	0	3.77049e-05	0	0
MACKEREL				Per kg live weight	Per kg live weight	Per kg edible weight
Average		1	kg CO2e	0	0.196278	1.03527
			kg CO2	0	0.144506	0.935555	0	0	0	0	0	0	0	0.144506	0	0.0883748	0.381773	0.3	0.1145
			kg CH4	0	6.40115e-05	0.000123292	0	0	0	0	0	0	0	6.40115e-05	0	0	0.000104937	0	0
			kg N2O	0	3.88295e-06	7.47892e-06	0	0	0	0	0	0	0	3.88295e-06	0	0	6.36548e-06	0	0
			kg HCFC-22	0	2.3e-05	4.43002e-05	0	0	0	0	0	0	0	0	2.3e-05	0	3.77049e-05	0	0
Sweden, Norway, Latvia	Wild-caught with pelagic trawl	0.03	kg CO2e	0	0.510438	1.64037
			kg CO2	0	0.451583	1.52701	0	0	0	0	0	0	0	0.451583	0	0.0883748	0.885176	0.3	0.1145
			kg CH4	0	0.000200036	0.000385288	0	0	0	0	0	0	0	0.000200036	0	0	0.000327928	0	0
			kg N2O	0	1.21342e-05	2.33716e-05	0	0	0	0	0	0	0	1.21342e-05	0	0	1.98921e-05	0	0
			kg HCFC-22	0	2.3e-05	4.43002e-05	0	0	0	0	0	0	0	0	2.3e-05	0	3.77049e-05	0	0
Sweden, Norway, Latvia	Wild-caught with purse seine	0.88	kg CO2e	0	0.180438	1.00476
			kg CO2	0	0.129024	0.905734	0	0	0	0	0	0	0	0.129024	0	0.0883748	0.356391	0.3	0.1145
			kg CH4	0	5.71531e-05	0.000110082	0	0	0	0	0	0	0	5.71531e-05	0	0	9.36937e-05	0	0
			kg N2O	0	3.46692e-06	6.67761e-06	0	0	0	0	0	0	0	3.46692e-06	0	0	5.68347e-06	0	0
			kg HCFC-22	0	2.3e-05	4.43002e-05	0	0	0	0	0	0	0	0	2.3e-05	0	3.77049e-05	0	0
Sweden, Norway, Latvia	Wild-caught with trolling line	0.09	kg CO2e	0	0.246438	1.13189
			kg CO2	0	0.193535	1.02999	0	0	0	0	0	0	0	0.193535	0	0.0883748	0.462148	0.3	0.1145
			kg CH4	0	8.57297e-05	0.000165124	0	0	0	0	0	0	0	8.57297e-05	0	0	0.00014054	0	0
			kg N2O	0	5.20037e-06	1.00164e-05	0	0	0	0	0	0	0	5.20037e-06	0	0	8.5252e-06	0	0
			kg HCFC-22	0	2.3e-05	4.43002e-05	0	0	0	0	0	0	0	0	2.3e-05	0	3.77049e-05	0	0
SAITHE				Per kg live weight	Per kg live weight	Per kg edible weight
Average		1	kg CO2e	0	1.81554	4.90036
			kg CO2	0	1.28056	3.563	0	0	0	0	0	0	0	1.28056	0	0.06014	2.85255	0.1	0.08
			kg CH4	0	0.000567245	0.00141801	0	0	0	0	0	0	0	0.000567245	0	0	0.0012069	0	0
			kg N2O	0	3.44091e-05	8.60169e-05	0	0	0	0	0	0	0	3.44091e-05	0	0	7.32109e-05	0	0
			kg HCFC-22	0	0.00024	0.000599958	0	0	0	0	0	0	0	0	0.00024	0	0.000510638	0	0
Norway, Denmark	Wild-caught with bottom trawl	0.4	kg CO2e	0	1.99044	5.33758
			kg CO2	0	1.45152	3.99036	0	0	0	0	0	0	0	1.45152	0	0.06014	3.21629	0.1	0.08
			kg CH4	0	0.000642973	0.00160732	0	0	0	0	0	0	0	0.000642973	0	0	0.00136803	0	0
			kg N2O	0	3.90028e-05	9.75002e-05	0	0	0	0	0	0	0	3.90028e-05	0	0	8.29847e-05	0	0
			kg HCFC-22	0	0.00024	0.000599958	0	0	0	0	0	0	0	0	0.00024	0	0.000510638	0	0
Norway, Denmark	Wild-caught with pelagic trawl	0.4	kg CO2e	0	1.72644	4.67762
			kg CO2	0	1.19347	3.34529	0	0	0	0	0	0	0	1.19347	0	0.06014	2.66725	0.1	0.08
			kg CH4	0	0.000528666	0.00132157	0	0	0	0	0	0	0	0.000528666	0	0	0.00112482	0	0
			kg N2O	0	3.2069e-05	8.01669e-05	0	0	0	0	0	0	0	3.2069e-05	0	0	6.82319e-05	0	0
			kg HCFC-22	0	0.00024	0.000599958	0	0	0	0	0	0	0	0	0.00024	0	0.000510638	0	0
Norway, Denmark	Wild-caught with purse seine	0.1	kg CO2e	0	1.46244	4.01767
			kg CO2	0	0.935421	2.70022	0	0	0	0	0	0	0	0.935421	0	0.06014	2.11822	0.1	0.08
			kg CH4	0	0.00041436	0.00103583	0	0	0	0	0	0	0	0.00041436	0	0	0.000881617	0	0
			kg N2O	0	2.51351e-05	6.28335e-05	0	0	0	0	0	0	0	2.51351e-05	0	0	5.3479e-05	0	0
			kg HCFC-22	0	0.00024	0.000599958	0	0	0	0	0	0	0	0	0.00024	0	0.000510638	0	0
Norway, Denmark	Wild-caught with autoline	0.1	kg CO2e	0	1.82544	4.92511
			kg CO2	0	1.29024	3.58719	0	0	0	0	0	0	0	1.29024	0	0.06014	2.87314	0.1	0.08
			kg CH4	0	0.000571531	0.00142873	0	0	0	0	0	0	0	0.000571531	0	0	0.00121602	0	0
			kg N2O	0	3.46692e-05	8.66669e-05	0	0	0	0	0	0	0	3.46692e-05	0	0	7.37642e-05	0	0
			kg HCFC-22	0	0.00024	0.000599958	0	0	0	0	0	0	0	0	0.00024	0	0.000510638	0	0
NORTHERN PRAWN				Per kg live weight	Per kg live weight	Per kg edible weight
Norway and Denmark	Wild-caught with bottom trawl	1	kg CO2e	0	4.30044	14.4429
			kg CO2	0	3.70943	12.5141	0	0	0	0	0	0	0	3.70943	0	0.06014	10.471	0.1	0.08
			kg CH4	0	0.00164315	0.00536269	0	0	0	0	0	0	0	0.00164315	0	0	0.00456431	0	0
			kg N2O	0	9.96738e-05	0.000325302	0	0	0	0	0	0	0	9.96738e-05	0	0	0.000276872	0	0
			kg HCFC-22	0	0.00024	0.000783279	0	0	0	0	0	0	0	0	0.00024	0	0.000666667	0	0
ALASKA POLLOCK				Per kg live weight	Per kg live weight	Per kg edible weight
United States	Wild-caught with pelagic trawl	1	kg CO2e	0	0.573939	3.37689
			kg CO2	0	0.290303	2.56409	0	0	0	0	0	0	0	0.290303	0	0.393723	1.66836	0.1	0.414
			kg CH4	0	0.000128595	0.000368508	0	0	0	0	0	0	0	0.000128595	0	0	0.000313645	0	0
			kg N2O	0	7.80056e-06	2.23537e-05	0	0	0	0	0	0	0	7.80056e-06	0	0	1.90258e-05	0	0
			kg HCFC-22	0	0.0001315	0.000376834	0	0	0	0	0	0	0	0	0.0001315	0	0.000320732	0	0
RAINBOW TROUT				Per kg live weight	Per kg live weight	Per kg edible weight
Sweden	Farmed	1	kg CO2e	1.25602	3.02926	6.10322
			kg CO2	0.393259	1.81593	3.76623	0.09	1.18667	0	0.139965	0.253294	0.036	0.11	0	0	0.06014	3.07552	0.1	0.03
			kg CH4	0	0.000271587	0.000523103	0	0.000271587	0	0	0	0	0	0	0	0	0.000445225	0	0
			kg N2O	0.00289517	0.00404059	0.00778257	0	0.00114542	0.00289517	0	0	0	0	0	0	0	0.00662392	0	0
			kg HCFC-22	0	0	0	0	0	0	0	0	0	0	0	0	0	0	0	0
PANGASIUS				Per kg live weight	Per kg live weight	Per kg edible weight
Vietnam	Farmed	1	kg CO2e	1.56605	3.21885	13.8661
			kg CO2	0.724854	2.03586	9.39627	0.05	1.157	0	0.141867	0.582986	0.054	0.05	0	0	0.270766	6.78418	0.1	0.43
			kg CH4	0	0.000264798	0.00100052	0	0.000264798	0	0	0	0	0	0	0	0	0.000778816	0	0
			kg N2O	0.00282279	0.00393958	0.0148854	0	0.00111679	0.00282279	0	0	0	0	0	0	0	0.011587	0	0
			kg HCFC-22	0	0	0	0	0	0	0	0	0	0	0	0	0	0	0	0
EUROPEAN PLAICE				Per kg live weight	Per kg live weight	Per kg edible weight
Average		1	kg CO2e	0	9.44844	23.2805
			kg CO2	0	8.74135	21.585	0	0	0	0	0	0	0	8.74135	0	0.123975	18.0925	0.1	0.179
			kg CH4	0	0.00387212	0.00928455	0	0	0	0	0	0	0	0.00387212	0	0	0.00790229	0	0
			kg N2O	0	0.000234884	0.000563202	0	0	0	0	0	0	0	0.000234884	0	0	0.000479354	0	0
			kg HCFC-22	0	0.00024	0.00057547	0	0	0	0	0	0	0	0	0.00024	0	0.000489796	0	0
The Netherlands, Denmark	Wild-caught with bottom trawl	0.5	kg CO2e	0	9.44844	23.2805
			kg CO2	0	8.74135	21.585	0	0	0	0	0	0	0	8.74135	0	0.123975	18.0925	0.1	0.179
			kg CH4	0	0.00387212	0.00928455	0	0	0	0	0	0	0	0.00387212	0	0	0.00790229	0	0
			kg N2O	0	0.000234884	0.000563202	0	0	0	0	0	0	0	0.000234884	0	0	0.000479354	0	0
			kg HCFC-22	0	0.00024	0.00057547	0	0	0	0	0	0	0	0	0.00024	0	0.000489796	0	0
The Netherlands, Denmark	Wild-caught with beam trawl	0.5	kg CO2e	0	9.44844	23.2805
			kg CO2	0	8.74135	21.585	0	0	0	0	0	0	0	8.74135	0	0.123975	18.0925	0.1	0.179
			kg CH4	0	0.00387212	0.00928455	0	0	0	0	0	0	0	0.00387212	0	0	0.00790229	0	0
			kg N2O	0	0.000234884	0.000563202	0	0	0	0	0	0	0	0.000234884	0	0	0.000479354	0	0
			kg HCFC-22	0	0.00024	0.00057547	0	0	0	0	0	0	0	0	0.00024	0	0.000489796	0	0
HOKI				Per kg live weight	Per kg live weight	Per kg edible weight
Average		1	kg CO2e	0	2.50444	7.14893
			kg CO2	0	2.17727	6.42366	0	0	0	0	0	0	0	2.17727	0	0.38651	4.83733	0.1	0.53
			kg CH4	0	0.000964459	0.00213804	0	0	0	0	0	0	0	0.000964459	0	0	0.00181973	0	0
			kg N2O	0	5.85042e-05	0.000129694	0	0	0	0	0	0	0	5.85042e-05	0	0	0.000110385	0	0
			kg HCFC-22	0	0.0001315	0.000291513	0	0	0	0	0	0	0	0	0.0001315	0	0.000248113	0	0
New Zeeland	Wild-caught with bottom trawl	0.5	kg CO2e	0	2.48794	7.11235
			kg CO2	0	2.16115	6.38791	0	0	0	0	0	0	0	2.16115	0	0.38651	4.8069	0.1	0.53
			kg CH4	0	0.000957315	0.0021222	0	0	0	0	0	0	0	0.000957315	0	0	0.00180625	0	0
			kg N2O	0	5.80708e-05	0.000128733	0	0	0	0	0	0	0	5.80708e-05	0	0	0.000109568	0	0
			kg HCFC-22	0	0.0001315	0.000291513	0	0	0	0	0	0	0	0	0.0001315	0	0.000248113	0	0
New Zeeland	Wild-caught with pelagic trawl	0.5	kg CO2e	0	2.52094	7.18551
			kg CO2	0	2.1934	6.45942	0	0	0	0	0	0	0	2.1934	0	0.38651	4.86776	0.1	0.53
			kg CH4	0	0.000971603	0.00215388	0	0	0	0	0	0	0	0.000971603	0	0	0.00183321	0	0
			kg N2O	0	5.89376e-05	0.000130654	0	0	0	0	0	0	0	5.89376e-05	0	0	0.000111203	0	0
			kg HCFC-22	0	0.0001315	0.000291513	0	0	0	0	0	0	0	0	0.0001315	0	0.000248113	0	0

## Sheet: Grains, oil crops, sugar
Results grains, oil crops and sugar				Choice of climate metric:	GWP100 with fb
				Include land use change?	Yes
				Include soil carbon changes? Go to: "Common input data" --> "Choose factors for soil carbon changes"	Yes
				RESULTS					Soil emissions
	Production system	Share of market	Emissions	Agricultural emissions only	To farm-gate	To retail-gate	Production of mineral fertilizer	Production of capital goods	Direct emissions	Indirect emissions	Diesel use machinery	Energy use in greenhouses	Energy use for irrigation	Energy use for drying	Soil carbon emissions	LUC emissions	Energy use processing	Total after processing	Packaging	Transportation
GRAINS AVERAGE				Per kg grains	Per kg grains	Per kg milled grains
Average of all grains		1	kg CO2e	0.377651	0.629927	1.1627
			kg CO2	0.116392	0.299469	0.698374	0.0519008	0.03	0	0	0.0292564	0	0.02	0.039147	0.108272	0	0.13069	0.50837	0.05	0.03
			kg CH4	0	2.9172e-05	5.33456e-05	1.3895e-10	0	0	0	1.29596e-05	0	0	1.4177e-05	0	0	8.85665e-06	4.49429e-05	0	0
			kg N2O	0.000876709	0.00110559	0.00155205	0.000210805	0	0.000741403	7.41403e-05	7.8613e-07	0	0	1.32161e-06	0	0	8.25637e-07	0.00130758	0	0
WHEAT				Per kg wheat	Per kg wheat	Per kg milled wheat
Average of winter wheat and spring wheat	Open-field		kg CO2e	0.383346	0.640019	1.17686
			kg CO2	0.116392	0.300754	0.700176	0.0543164	0.03	0	0	0.0280359	0	0.02	0.039147	0.108272	0	0.13069	0.509889	0.05	0.03
			kg CH4	0	2.85908e-05	5.25303e-05	1.45418e-10	0	0	0	1.2419e-05	0	0	1.4177e-05	0	0	8.85665e-06	4.42561e-05	0	0
			kg N2O	0.000895817	0.00113521	0.0015936	0.000220617	0	0.000757562	7.57562e-05	7.53336e-07	0	0	1.32161e-06	0	0	8.25637e-07	0.00134259	0	0
Winter wheat
Sweden	Open-field	0.649983	kg CO2e	0.376318	0.627955	1.15993
			kg CO2	0.116392	0.297248	0.695258	0.0531804	0.03	0	0	0.0259106	0	0.02	0.039147	0.108272	0	0.13069	0.505745	0.05	0.03
			kg CH4	0	2.75788e-05	5.11106e-05	1.42376e-10	0	0	0	1.14775e-05	0	0	1.4177e-05	0	0	8.85665e-06	4.306e-05	0	0
			kg N2O	0.000872235	0.00110661	0.00155348	0.000216003	0	0.000737619	7.37619e-05	6.96228e-07	0	0	1.32161e-06	0	0	8.25637e-07	0.00130878	0	0
Spring wheat
Sweden	Open-field	0.132026	kg CO2e	0.417943	0.699413	1.26017
			kg CO2	0.116392	0.318014	0.724387	0.0599088	0.03	0	0	0.038499	0	0.02	0.039147	0.108272	0	0.13069	0.530287	0.05	0.03
			kg CH4	0	3.35732e-05	5.95196e-05	1.6039e-10	0	0	0	1.70538e-05	0	0	1.4177e-05	0	0	8.85665e-06	5.01444e-05	0	0
			kg N2O	0.00101192	0.00127603	0.00179114	0.000243332	0	0.000855744	8.55744e-05	1.03448e-06	0	0	1.32161e-06	0	0	8.25637e-07	0.00150901	0	0
RYE				Per kg rye	Per kg rye	Per kg milled rye
Sweden	Open-field	0.114914	kg CO2e	0.333934	0.558241	1.06214
			kg CO2	0.116392	0.286603	0.680325	0.0403013	0.03	0	0	0.0288871	0	0.02	0.039147	0.108272	0	0.13069	0.493165	0.05	0.03
			kg CH4	0	2.89961e-05	5.30988e-05	1.07896e-10	0	0	0	1.2796e-05	0	0	1.4177e-05	0	0	8.85665e-06	4.4735e-05	0	0
			kg N2O	0.000730006	0.00090823	0.0012752	0.000163692	0	0.000617341	6.17341e-05	7.76207e-07	0	0	1.32161e-06	0	0	8.25637e-07	0.00107434	0	0
BARLEY				Per kg barley	Per kg barley	Per kg milled barley
Average of winter barley and spring barley	Open-field		kg CO2e	0.375932	0.620837	1.14995
			kg CO2	0.116392	0.300169	0.699356	0.045565	0.03	0	0	0.0362437	0	0.02	0.039147	0.108272	0	0.13069	0.509198	0.05	0.03
			kg CH4	0	3.24992e-05	5.80129e-05	1.21988e-10	0	0	0	1.60547e-05	0	0	1.4177e-05	0	0	8.85665e-06	4.88751e-05	0	0
			kg N2O	0.000870938	0.00107236	0.00150543	0.000185071	0	0.000736522	7.36522e-05	9.73881e-07	0	0	1.32161e-06	0	0	8.25637e-07	0.00126831	0	0
Winter barley
Sweden	Open-field	0.00227371	kg CO2e	0.35332	0.588488	1.10457
			kg CO2	0.116392	0.291832	0.687661	0.0446185	0.03	0	0	0.0294343	0	0.02	0.039147	0.108272	0	0.13069	0.499345	0.05	0.03
			kg CH4	0	2.92567e-05	5.34644e-05	1.19454e-10	0	0	0	1.30384e-05	0	0	1.4177e-05	0	0	8.85665e-06	4.5043e-05	0	0
			kg N2O	0.000795062	0.000992152	0.00139292	0.000181227	0	0.000672356	6.72356e-05	7.90912e-07	0	0	1.32161e-06	0	0	8.25637e-07	0.00117352	0	0
Spring barley
Sweden	Open-field	0.0492653	kg CO2e	0.376975	0.62233	1.15204
			kg CO2	0.116392	0.300554	0.699896	0.0456086	0.03	0	0	0.0365579	0	0.02	0.039147	0.108272	0	0.13069	0.509653	0.05	0.03
			kg CH4	0	3.26489e-05	5.82229e-05	1.22105e-10	0	0	0	1.61939e-05	0	0	1.4177e-05	0	0	8.85665e-06	4.9052e-05	0	0
			kg N2O	0.000874439	0.00107606	0.00151063	0.000185249	0	0.000739484	7.39484e-05	9.82326e-07	0	0	1.32161e-06	0	0	8.25637e-07	0.00127268	0	0
OATS				Per kg oats	Per kg oats	Per kg milled oats
Sweden	Open-field	0.051539	kg CO2e	0.390446	0.645725	1.18486
			kg CO2	0.116392	0.307962	0.710287	0.0474467	0.03	0	0	0.0416106	0	0.02	0.039147	0.108272	0	0.13069	0.518407	0.05	0.03
			kg CH4	0	3.50549e-05	6.1598e-05	1.27026e-10	0	0	0	1.84321e-05	0	0	1.4177e-05	0	0	8.85665e-06	5.18955e-05	0	0
			kg N2O	0.000919644	0.00112943	0.0015855	0.000192714	0	0.000777712	7.77712e-05	1.11809e-06	0	0	1.32161e-06	0	0	8.25637e-07	0.00133576	0	0
RICE				Per kg rice	Per kg rice	Per kg milled rice
Average		1	kg CO2e	1.02807	1.76497	3.57956
			kg CO2	0.124152	0.732468	1.80658	0.0581895	0.03	0	0	0.123099	0	0.1482	0.17102	0.108272	0	0.0129097	1.09102	0.05	0.402
			kg CH4	0.0208618	0.0209475	0.0360198	3.11886e-10	0	0.0181935	0	5.45286e-05	0	0	2.01991e-05	0	0	0	0.0306611	0	0
			kg N2O	0.000653065	0.00107478	0.00183997	0.000362581	0	0.000517758	5.17758e-05	3.30771e-06	0	0	1.883e-06	0	0	0	0.00157316	0	0
Thailand	Open-field	0.19	kg CO2e	0.849988	1.52143	3.09959
			kg CO2	0.124152	0.657572	1.66192	0.0612682	0.03	0	0	0.171252	0	0.03	0.172673	0.108272	0	0.0130907	0.981656	0.05	0.43
			kg CH4	0.0152028	0.0153129	0.0254846	3.34198e-10	0	0.0132583	0	7.58588e-05	0	0	2.01991e-05	0	0	0	0.0224137	0	0
			kg N2O	0.000701147	0.00115173	0.00191676	0.000386463	0	0.000555877	5.55877e-05	4.6016e-06	0	0	1.883e-06	0	0	0	0.00168579	0	0
Italy	Open-field	0.14	kg CO2e	2.07871	2.79051	5.19049
			kg CO2	0.124152	0.76196	1.66615	0.0377016	0.03	0	0	0.0828389	0	0.3	0.105688	0.108272	0	0.0057525	1.12371	0.05	0.23
			kg CH4	0.0527915	0.0528567	0.0918316	1.66232e-10	0	0.0460391	0	3.66949e-05	0	0	2.01991e-05	0	0	0	0.0773669	0	0
			kg N2O	0.000535732	0.000776582	0.00134921	0.000205935	0	0.000424735	4.24735e-05	2.22591e-06	0	0	1.883e-06	0	0	0	0.00113669	0	0
Rest of the world	Open-field	0.67	kg CO2e	0.859031	1.61974	3.37907
			kg CO2	0.124152	0.747545	1.87695	0.0615975	0.03	0	0	0.117856	0	0.15	0.184203	0.108272	0	0.0143539	1.1152	0.05	0.43
			kg CH4	0.0157948	0.0158778	0.0273453	3.35994e-10	0	0.0137745	0	5.22062e-05	0	0	2.01991e-05	0	0	0	0.0232405	0	0
			kg N2O	0.000663948	0.00111526	0.00192074	0.00038854	0	0.000526385	5.26385e-05	3.16684e-06	0	0	1.883e-06	0	0	0	0.00163242	0	0
RAPESEED/RAPESEED OIL				Per kg rapeseed	Per kg rapeseed	Per liter rapeseed oil
Average		1	kg CO2e	0.661017	1.12244	2.373
			kg CO2	0.171049	0.475761	1.22498	0.117432	0.03	0	0	0.0592081	0	0.02	0.0579808	0.159771	0	0.0133477	0.804682	0.3	0.0358935
			kg CH4	0	5.09126e-05	0.00019401	3.20856e-10	0	0	0	2.62272e-05	0	0	2.13282e-05	0	0	5.88866e-05	0.000180642	0	0
			kg N2O	0.00164419	0.00216425	0.00383028	0.0004822	0	0.00139616	0.000139616	1.59094e-06	0	0	1.98826e-06	0	0	3.47983e-06	0.00356636	0	0
Winter rapeseed
Sweden	Open-field	0.739217	kg CO2e	0.623065	1.05942	2.25532
			kg CO2	0.171049	0.459501	1.18992	0.112106	0.03	0	0	0.0494493	0	0.02	0.0578769	0.159771	0	0.0133477	0.77793	0.3	0.03
			kg CH4	0	4.62846e-05	0.000185833	3.00135e-10	0	0	0	2.19044e-05	0	0	2.13282e-05	0	0	5.88866e-05	0.000173028	0	0
			kg N2O	0.00151683	0.00200787	0.00355395	0.000455342	0	0.00128802	0.000128802	1.32872e-06	0	0	1.98826e-06	0	0	3.47983e-06	0.00330907	0	0
Spring rapeseed
Sweden	Open-field	0.231316	kg CO2e	0.804227	1.33455	2.74147
			kg CO2	0.171049	0.52505	1.30574	0.133277	0.03	0	0	0.0895057	0	0.02	0.0578769	0.159771	0	0.0133477	0.885772	0.3	0.03
			kg CH4	0	6.52808e-05	0.000219398	3.56815e-10	0	0	0	3.9648e-05	0	0	2.13282e-05	0	0	5.88866e-05	0.00020428	0	0
			kg N2O	0.00212476	0.002709	0.00479283	0.000541333	0	0.00180424	0.000180424	2.40505e-06	0	0	1.98826e-06	0	0	3.47983e-06	0.00446258	0	0
Rapeseed
Rest of Europe	Open-field	0.0294675	kg CO2e	0.488878	1.03832	2.43284
			kg CO2	0.171049	0.496751	1.47054	0.126644	0.03	0	0	0.0661818	0	0.02	0.0614013	0.159771	0	0.0133477	0.839215	0.3	0.23
			kg CH4	0	5.422e-05	0.000199854	5.58392e-10	0	0	0	2.93163e-05	0	0	2.13282e-05	0	0	5.88866e-05	0.000186083	0	0
			kg N2O	0.00106654	0.00181116	0.00320639	0.000691761	0	0.000905653	9.05653e-05	1.77833e-06	0	0	1.98826e-06	0	0	3.47983e-06	0.00298545	0	0
OLIVE/OLIVE OIL				Per kg olives	Per kg olives	Per liter olive oil
Average		1	kg CO2e	0.00508525	0.689332	4.04485
			kg CO2	-0.182278	0.362311	2.42484	0.0407516	0.03	0	0	0.151543	0	0.05	0	-0.091139	0	0.0133477	1.71676	0.3	0.241
			kg CH4	0	0.000134257	0.000947988	1.7968e-10	0	0	0	6.71284e-05	0	0	0	0	0	5.88866e-05	0.000882667	0	0
			kg N2O	0.000628736	0.00108207	0.0053281	0.000222595	0	0.000285789	2.85789e-05	4.07201e-06	0	0	0	0	0	3.47983e-06	0.00496096	0	0
Greece	Open-field	0.11	kg CO2e	-0.0314946	0.61372	3.76931
			kg CO2	-0.182278	0.329567	2.35971	0.0390274	0.03	0	0	0.136895	0	0.05	0	-0.091139	0	0.0133477	1.56712	0.3	0.33
			kg CH4	0	0.00012128	0.000884294	1.72078e-10	0	0	0	6.06398e-05	0	0	0	0	0	5.88866e-05	0.000823362	0	0
			kg N2O	0.000505985	0.000939696	0.0046293	0.000213177	0	0.000229993	2.29993e-05	3.67842e-06	0	0	0	0	0	3.47983e-06	0.00431032	0	0
Italy	Open-field	0.56	kg CO2e	0.0492339	0.782307	4.48937
			kg CO2	-0.182278	0.393276	2.56501	0.0460942	0.03	0	0	0.161683	0	0.05	0	-0.091139	0	0.0133477	1.85827	0.3	0.23
			kg CH4	0	0.00014324	0.00099208	2.03236e-10	0	0	0	7.162e-05	0	0	0	0	0	5.88866e-05	0.00092372	0	0
			kg N2O	0.000776886	0.00128913	0.00634439	0.000251778	0	0.00035313	3.5313e-05	4.34448e-06	0	0	0	0	0	3.47983e-06	0.00590723	0	0
Spain	Open-field	0.28	kg CO2e	-0.0574248	0.553545	3.36656
			kg CO2	-0.182278	0.317149	2.19137	0.0323159	0.03	0	0	0.137398	0	0.05	0	-0.091139	0	0.0133477	1.51037	0.3	0.23
			kg CH4	0	0.000121725	0.00088648	1.42485e-10	0	0	0	6.08625e-05	0	0	0	0	0	5.88866e-05	0.000825397	0	0
			kg N2O	0.000418971	0.000779389	0.00384248	0.000176517	0	0.000190441	1.90441e-05	3.69193e-06	0	0	0	0	0	3.47983e-06	0.00357771	0	0
Rest of Europe	Open-field	0.05	kg CO2e	-0.0588482	0.574774	3.47076
			kg CO2	-0.182278	0.340446	2.30571	0.0319475	0.03	0	0	0.149414	0	0.05	0	-0.091139	0	0.0133477	1.61684	0.3	0.23
			kg CH4	0	0.000132371	0.000938733	1.40861e-10	0	0	0	6.61856e-05	0	0	0	0	0	5.88866e-05	0.000874049	0	0
			kg N2O	0.000414194	0.000771234	0.00380245	0.000174505	0	0.00018827	1.8827e-05	4.01482e-06	0	0	0	0	0	3.47983e-06	0.00354044	0	0
SUGAR BEET/SUGAR				Per kg sugar beet	Per kg sugar beet	Per kg sugar
Sweden	Open-field	1	kg CO2e	0.400287	0.824786	1.52317
			kg CO2	0.259932	0.650312	1.23674	0.00422546	0.03	0	0	0.00583308	0	0.02	0	0.0399895	0	0.0581371	0.809656	0.05	0.03
			kg CH4	0	1.67951e-05	0.000270675	1.13126e-11	0	0	0	2.58386e-06	0	0	0	0	0	0.000153577	0.000194712	0	0
			kg N2O	0.000470992	0.000583567	0.000930271	1.71626e-05	0	6.5873e-05	6.5873e-06	1.56737e-07	0	0	0	0	0	1.97846e-06	0.000669195	0	0

## Sheet: Vegetables, roots, legumes
Results vegetables, root crops and legumes				Choice of climate metric:	GWP100 with fb
				Include land use change?	Yes
				Include soil carbon changes? Go to: "Common input data" --> "Choose factors for soil carbon changes"	Yes
				RESULTS					Soil emissions
	Production system	Share of market	Emissions	Agricultural emissions only	To farm-gate	To retail-gate	Production of mineral fertilizer	Production of capital goods	Direct emissions	Indirect emissions	Diesel use machinery	Energy use in greenhouses	Energy use for irrigation	Energy use for drying	Soil carbon emissions	LUC emissions	Energy use processing	Total after processing	Packaging	Transportation
TOMATO				Per kg tomato	Per kg tomato	Per kg tomato
Average		1	kg CO2e	0.0186769	1.05581	1.49399
			kg CO2	0.00519863	0.899744	1.30773	0.00700097	0.03	0	0	0.000842993	0.851502	0.0052	0	0.00519863	0	0	0.899744	0.05	0.146
			kg CH4	0	0.00359859	0.00429478	2.90536e-11	0	0	0	3.73418e-07	0.00359822	0	0	0	0	0	0.00359859	0	0
			kg N2O	4.52291e-05	0.000113145	0.000135034	3.67735e-05	0	4.34316e-05	1.7975e-06	2.26516e-08	3.11193e-05	0	0	0	0	0	0.000113145	0	0
Sweden	Greenhouse	0.14	kg CO2e	0.0146508	0.842824	1.10135
			kg CO2	0	0.751114	0.991901	0.00748434	0.03	0	0	0	0.71363	0	0	0	0	0	0.751114	0.05	0.03
			kg CH4	0	0.00168176	0.00200711	2.00373e-11	0	0	0	0	0.00168176	0	0	0	0	0	0.00168176	0	0
			kg N2O	4.91637e-05	0.000115873	0.00013829	3.03992e-05	0	4.68672e-05	2.29649e-06	0	3.63106e-05	0	0	0	0	0	0.000115873	0	0
The Netherlands	Greenhouse	0.56	kg CO2e	0.00993364	1.5342	2.04583
			kg CO2	0	1.3069	1.77456	0.00565649	0.03	0	0	0	1.27124	0	0	0	0	0	1.3069	0.05	0.13
			kg CH4	0	0.0057399	0.00685034	2.49403e-11	0	0	0	0	0.0057399	0	0	0	0	0	0.0057399	0	0
			kg N2O	3.33344e-05	0.000107869	0.000128737	3.08971e-05	0	3.33344e-05	0	0	4.36373e-05	0	0	0	0	0	0.000107869	0	0
Spain	Greenhouse	0.11	kg CO2e	0.0184973	0.093659	0.445947
			kg CO2	0	0.0595754	0.40527	0.00957536	0.03	0	0	0	0	0.02	0	0	0	0	0.0595754	0.05	0.23
			kg CH4	0	4.22192e-11	5.03869e-11	4.22192e-11	0	0	0	0	0	0	0	0	0	0	4.22192e-11	0	0
			kg N2O	6.20716e-05	0.000114375	0.000136501	5.2303e-05	0	5.64288e-05	5.64288e-06	0	0	0	0	0	0	0	0.000114375	0	0
Spain	Open-field	0.07	kg CO2e	0.0634138	0.143801	0.505789
			kg CO2	0.0399895	0.104332	0.458684	0.00979264	0.03	0	0	0.00454957	0	0.02	0	0.0399895	0	0	0.104332	0.05	0.23
			kg CH4	0	2.01535e-06	2.40524e-06	4.31772e-11	0	0	0	2.01531e-06	0	0	0	0	0	0	2.01535e-06	0	0
			kg N2O	7.86051e-05	0.000132217	0.000157796	5.34898e-05	0	7.14592e-05	7.14592e-06	1.22249e-07	0	0	0	0	0	0	0.000132217	0	0
Rest of Europe	Greenhouse	0.06	kg CO2e	0.0232049	0.847441	1.34556
			kg CO2	0	0.711188	1.18294	0.0128975	0.03	0	0	0	0.661624	0.00666667	0	0	0	0	0.711188	0.05	0.23
			kg CH4	0	0.00247388	0.00295248	5.68671e-11	0	0	0	0	0.00247388	0	0	0	0	0	0.00247388	0	0
			kg N2O	7.78688e-05	0.000174968	0.000208817	7.04494e-05	0	7.60067e-05	1.86216e-06	0	2.66493e-05	0	0	0	0	0	0.000174968	0	0
Rest of Europe	Open-field	0.06	kg CO2e	0.0532832	0.124179	0.482371
			kg CO2	0.0399895	0.10328	0.457429	0.0045484	0.03	0	0	0.00874206	0	0.02	0	0.0399895	0	0	0.10328	0.05	0.23
			kg CH4	0	3.87246e-06	4.62162e-06	2.00546e-11	0	0	0	3.87244e-06	0	0	0	0	0	0	3.87246e-06	0	0
			kg N2O	4.46099e-05	6.96892e-05	8.31713e-05	2.48445e-05	0	4.05544e-05	4.05544e-06	2.34902e-07	0	0	0	0	0	0	6.96892e-05	0	0
CUCUMBER				Per kg cucumber	Per kg cucumber	Per kg cucumber
Average		1	kg CO2e	0.0247663	0.446102	0.7341
			kg CO2	0.00879769	0.375549	0.649898	0.007215	0.03	0	0	0.00160321	0.319	0.00893333	0	0.00879769	0	0	0.375549	0.05	0.119
			kg CH4	0	0.00118476	0.00141396	2.55504e-11	0	0	0	7.1017e-07	0.00118405	0	0	0	0	0	0.00118476	0	0
			kg N2O	5.35859e-05	0.000101582	0.000121234	3.43466e-05	0	4.98474e-05	3.73857e-06	4.3079e-08	1.36065e-05	0	0	0	0	0	0.000101582	0	0
Sweden	Greenhouse	0.35	kg CO2e	0.0162106	0.582696	0.790902
			kg CO2	0	0.503002	0.69579	0.0082812	0.03	0	0	0	0.464721	0	0	0	0	0	0.503002	0.05	0.03
			kg CH4	0	0.00136602	0.00163029	2.21707e-11	0	0	0	0	0.00136602	0	0	0	0	0	0.00136602	0	0
			kg N2O	5.43981e-05	0.000111576	0.000133161	3.36358e-05	0	5.18571e-05	2.541e-06	0	2.35418e-05	0	0	0	0	0	0.000111576	0	0
Sweden	Open-field	0.12	kg CO2e	0.0635866	0.133303	0.254569
			kg CO2	0.0399895	0.102327	0.2176	0.0059749	0.03	0	0	0.00636282	0	0.02	0	0.0399895	0	0	0.102327	0.05	0.03
			kg CH4	0	2.81853e-06	3.3638e-06	1.59962e-11	0	0	0	2.81851e-06	0	0	0	0	0	0	2.81853e-06	0	0
			kg N2O	7.9185e-05	0.000103624	0.000123671	2.42682e-05	0	7.19864e-05	7.19864e-06	1.70971e-07	0	0	0	0	0	0	0.000103624	0	0
The Netherlands	Greenhouse	0.17	kg CO2e	0.00561852	1.11431	1.54471
			kg CO2	0	0.952892	1.35206	0.00319934	0.03	0	0	0	0.919692	0	0	0	0	0	0.952892	0.05	0.13
			kg CH4	0	0.00415258	0.00495594	1.41064e-11	0	0	0	0	0.00415258	0	0	0	0	0	0.00415258	0	0
			kg N2O	1.88541e-05	6.78995e-05	8.10353e-05	1.74756e-05	0	1.88541e-05	0	0	3.15698e-05	0	0	0	0	0	6.78995e-05	0	0
Spain	Greenhouse	0.26	kg CO2e	0.0160801	0.0879536	0.439138
			kg CO2	0	0.058324	0.403776	0.00832405	0.03	0	0	0	0	0.02	0	0	0	0	0.058324	0.05	0.23
			kg CH4	0	3.67019e-11	4.38023e-11	3.67019e-11	0	0	0	0	0	0	0	0	0	0	3.67019e-11	0	0
			kg N2O	5.39601e-05	9.94281e-05	0.000118663	4.5468e-05	0	4.90546e-05	4.90546e-06	0	0	0	0	0	0	0	9.94281e-05	0	0
Spain	Open-field	0.05	kg CO2e	0.0631532	0.143292	0.505182
			kg CO2	0.0399895	0.104125	0.458437	0.00976974	0.03	0	0	0.00436547	0	0.02	0	0.0399895	0	0	0.104125	0.05	0.23
			kg CH4	0	1.9338e-06	2.30791e-06	4.30762e-11	0	0	0	1.93376e-06	0	0	0	0	0	0	1.9338e-06	0	0
			kg N2O	7.77307e-05	0.000131213	0.000156597	5.33647e-05	0	7.06642e-05	7.06642e-06	1.17302e-07	0	0	0	0	0	0	0.000131213	0	0
Rest of Europe	Open-field	0.05	kg CO2e	0.0633707	0.13393	0.494009
			kg CO2	0.0399895	0.0971435	0.450106	0.00805933	0.03	0	0	0.012428	0	0.00666667	0	0.0399895	0	0	0.0971435	0.05	0.23
			kg CH4	0	5.50524e-06	6.57028e-06	3.55348e-11	0	0	0	5.5052e-06	0	0	0	0	0	0	5.50524e-06	0	0
			kg N2O	7.84606e-05	0.000122817	0.000146577	4.4022e-05	0	7.13278e-05	7.13278e-06	3.33946e-07	0	0	0	0	0	0	0.000122817	0	0
BELL PEPPER				Per kg bell pepper	Per kg bell pepper	Per kg bell pepper
Average		1	kg CO2e	0.0258459	1.73552	2.33373
			kg CO2	0.00958192	1.47444	2.02214	0.00730326	0.03	0	0	0.00189671	1.42223	0.00757292	0	0.00958192	0	0	1.47444	0.05	0.169909
			kg CH4	0	0.00642248	0.00766497	3.22012e-11	0	0	0	8.4018e-07	0.00642164	0	0	0	0	0	0.00642248	0	0
			kg N2O	5.45772e-05	0.000143341	0.000171071	3.98922e-05	0	5.1511e-05	3.06626e-06	5.09655e-08	4.88202e-05	0	0	0	0	0	0.000143341	0	0
The Netherlands	Greenhouse	0.600914	kg CO2e	0.00983123	2.71827	3.45896
			kg CO2	0	2.32452	2.98905	0.00559817	0.03	0	0	0	2.28892	0	0	0	0	0	2.32452	0.05	0.13
			kg CH4	0	0.0103349	0.0123343	2.46832e-11	0	0	0	0	0.0103349	0	0	0	0	0	0.0103349	0	0
			kg N2O	3.29907e-05	0.00014214	0.000169638	3.05786e-05	0	3.29907e-05	0	0	7.85707e-05	0	0	0	0	0	0.00014214	0	0
Spain	Greenhouse	0.118595	kg CO2e	0.0240728	0.106819	0.461652
			kg CO2	0	0.0624615	0.408714	0.0124615	0.03	0	0	0	0	0.02	0	0	0	0	0.0624615	0.05	0.23
			kg CH4	0	5.49447e-11	6.55743e-11	5.49447e-11	0	0	0	0	0	0	0	0	0	0	5.49447e-11	0	0
			kg N2O	8.07811e-05	0.000148849	0.000177645	6.8068e-05	0	7.34373e-05	7.34373e-06	0	0	0	0	0	0	0	0.000148849	0	0
Spain	Open-field	0.135981	kg CO2e	0.0750262	0.163621	0.529444
			kg CO2	0.0399895	0.108677	0.46387	0.0121374	0.03	0	0	0.00654985	0	0.02	0	0.0399895	0	0	0.108677	0.05	0.23
			kg CH4	0	2.90141e-06	3.46272e-06	5.35157e-11	0	0	0	2.90136e-06	0	0	0	0	0	0	2.90141e-06	0	0
			kg N2O	0.000117573	0.000184047	0.000219652	6.62976e-05	0	0.000106885	1.06885e-05	1.75997e-07	0	0	0	0	0	0	0.000184047	0	0
Rest of Europe	Greenhouse	0.0408799	kg CO2e	0.0101271	1.39678	2.00117
			kg CO2	0	1.19009	1.75449	0.00562877	0.03	0	0	0	1.14446	0.01	0	0	0	0	1.19009	0.05	0.23
			kg CH4	0	0.00516745	0.00616715	2.48181e-11	0	0	0	0	0.00516745	0	0	0	0	0	0.00516745	0	0
			kg N2O	3.39837e-05	0.000104015	0.000124137	3.07457e-05	0	3.3171e-05	8.1269e-07	0	3.92853e-05	0	0	0	0	0	0.000104015	0	0
Rest of Europe	Open-field	0.10363	kg CO2e	0.0624063	0.0970765	0.450026
			kg CO2	0.0399895	0.0653128	0.412117	0.00560461	0.03	0	0	0.00970818	0	0.02	0	0.0399895	0	0	0.0653128	0.05	0.23
			kg CH4	0	4.30042e-06	5.13238e-06	2.47115e-11	0	0	0	4.3004e-06	0	0	0	0	0	0	4.30042e-06	0	0
			kg N2O	7.52243e-05	0.000106099	0.000126625	3.06137e-05	0	6.83858e-05	6.83858e-06	2.60863e-07	0	0	0	0	0	0	0.000106099	0	0
ICEBERG LETTUCE				Per kg iceberg lettuce	Per kg iceberg lettuce	Per kg iceberg lettuce
Average		1	kg CO2e	0.065449	0.154346	0.322648
			kg CO2	0.0399895	0.115288	0.276033	0.0103446	0.03	0	0	0.0149542	0	0.02	0	0.0399895	0	0	0.115288	0.05	0.066
			kg CH4	0	6.62423e-06	7.90575e-06	3.07354e-11	0	0	0	6.62419e-06	0	0	0	0	0	0	6.62423e-06	0	0
			kg N2O	8.54346e-05	0.000130312	0.000155522	4.44755e-05	0	7.76678e-05	7.76678e-06	4.01824e-07	0	0	0	0	0	0	0.000130312	0	0
Sweden	Open-field	0.82	kg CO2e	0.0661265	0.154641	0.280035
			kg CO2	0.0399895	0.11548	0.233297	0.0104745	0.03	0	0	0.0150158	0	0.02	0	0.0399895	0	0	0.11548	0.05	0.03
			kg CH4	0	6.65152e-06	7.93833e-06	2.80428e-11	0	0	0	6.65149e-06	0	0	0	0	0	0	6.65152e-06	0	0
			kg N2O	8.77081e-05	0.000130656	0.000155933	4.25444e-05	0	7.97347e-05	7.97347e-06	4.0348e-07	0	0	0	0	0	0	0.000130656	0	0
Spain	Open-field	0.12	kg CO2e	0.0624444	0.152852	0.516592
			kg CO2	0.0399895	0.113943	0.470155	0.00990947	0.03	0	0	0.0140441	0	0.02	0	0.0399895	0	0	0.113943	0.05	0.23
			kg CH4	0	6.22109e-06	7.42462e-06	4.36923e-11	0	0	0	6.22105e-06	0	0	0	0	0	0	6.22109e-06	0	0
			kg N2O	7.53522e-05	0.000129857	0.00015498	5.41279e-05	0	6.8502e-05	6.8502e-06	3.77369e-07	0	0	0	0	0	0	0.000129857	0	0
Rest of Europe	Open-field	0.06	kg CO2e	0.0621989	0.153304	0.517131
			kg CO2	0.0399895	0.115361	0.471848	0.0094397	0.03	0	0	0.0159321	0	0.02	0	0.0399895	0	0	0.115361	0.05	0.23
			kg CH4	0	7.05743e-06	8.42276e-06	4.1621e-11	0	0	0	7.05739e-06	0	0	0	0	0	0	7.05743e-06	0	0
			kg N2O	7.45281e-05	0.000126518	0.000150994	5.1562e-05	0	6.77529e-05	6.77529e-06	4.28102e-07	0	0	0	0	0	0	0.000126518	0	0
POTATO				Per kg potato	Per kg potato	Per kg potato
Average		1	kg CO2e	0.0800343	0.164717	0.375639
			kg CO2	0.0399895	0.112022	0.302384	0.00971848	0.03	0	0	0.0123138	0	0.02	0	0.0399895	0	0	0.112022	0.05	0.0555
			kg CH4	0	5.45462e-06	7.58265e-06	2.85236e-11	0	0	0	5.45459e-06	0	0	0	0	0	0	5.45462e-06	0	0
			kg N2O	0.000134379	0.000176209	0.000244954	4.14992e-05	0	0.000122162	1.22162e-05	3.30876e-07	0	0	0	0	0	0	0.000176209	0	0
Sweden	Open-field	0.76	kg CO2e	0.0830704	0.16549	0.341264
			kg CO2	0.0399895	0.111255	0.26587	0.00898118	0.03	0	0	0.0122844	0	0.02	0	0.0399895	0	0	0.111255	0.05	0.03
			kg CH4	0	5.4416e-06	7.56455e-06	2.40447e-11	0	0	0	5.44158e-06	0	0	0	0	0	0	5.4416e-06	0	0
			kg N2O	0.000144567	0.000181376	0.000252137	3.64788e-05	0	0.000131424	1.31424e-05	3.30087e-07	0	0	0	0	0	0	0.000181376	0	0
Denmark	Open-field	0.15	kg CO2e	0.0651263	0.145677	0.383228
			kg CO2	0.0399895	0.10866	0.33177	0.00964297	0.03	0	0	0.00902789	0	0.02	0	0.0399895	0	0	0.10866	0.05	0.08
			kg CH4	0	3.99908e-06	5.55925e-06	2.58165e-11	0	0	0	3.99905e-06	0	0	0	0	0	0	3.99908e-06	0	0
			kg N2O	8.43517e-05	0.000123761	0.000172045	3.91668e-05	0	7.66834e-05	7.66834e-06	2.42583e-07	0	0	0	0	0	0	0.000123761	0	0
Rest of Europe	Open-field	0.09	kg CO2e	0.0792434	0.189927	0.653262
			kg CO2	0.0399895	0.124098	0.561751	0.0160705	0.03	0	0	0.0180384	0	0.02	0	0.0399895	0	0	0.124098	0.05	0.23
			kg CH4	0	7.99046e-06	1.11078e-05	7.08572e-11	0	0	0	7.99039e-06	0	0	0	0	0	0	7.99046e-06	0	0
			kg N2O	0.000131725	0.00021999	0.000305816	8.77811e-05	0	0.00011975	1.1975e-05	4.84698e-07	0	0	0	0	0	0	0.00021999	0	0
CARROT				Per kg carrot	Per kg carrot	Per kg carrot
Average		1	kg CO2e	0.0548056	0.120635	0.298371
			kg CO2	0.0399895	0.100594	0.270511	0.00395039	0.03	0	0	0.0066538	0	0.02	0	0.0399895	0	0	0.100594	0.05	0.044
			kg CH4	0	2.94742e-06	4.09731e-06	1.17788e-11	0	0	0	2.94741e-06	0	0	0	0	0	0	2.94742e-06	0	0
			kg N2O	4.97184e-05	6.6915e-05	9.30209e-05	1.70179e-05	0	4.51985e-05	4.51985e-06	1.7879e-07	0	0	0	0	0	0	6.6915e-05	0	0
Sweden	Open-field	0.93	kg CO2e	0.0533575	0.11753	0.274593
			kg CO2	0.0399895	0.0997794	0.249917	0.00350106	0.03	0	0	0.00628881	0	0.02	0	0.0399895	0	0	0.0997794	0.05	0.03
			kg CH4	0	2.78574e-06	3.87255e-06	9.37315e-12	0	0	0	2.78573e-06	0	0	0	0	0	0	2.78574e-06	0	0
			kg N2O	4.48589e-05	5.92482e-05	8.23629e-05	1.42202e-05	0	4.07809e-05	4.07809e-06	1.68983e-07	0	0	0	0	0	0	5.92482e-05	0	0
Rest of Europe	Open-field	0.07	kg CO2e	0.0740448	0.161881	0.614274
			kg CO2	0.0399895	0.111413	0.544116	0.00992013	0.03	0	0	0.011503	0	0.02	0	0.0399895	0	0	0.111413	0.05	0.23
			kg CH4	0	5.09547e-06	7.08338e-06	4.37393e-11	0	0	0	5.09542e-06	0	0	0	0	0	0	5.09547e-06	0	0
			kg N2O	0.00011428	0.000168775	0.00023462	5.41862e-05	0	0.000103891	1.03891e-05	3.09089e-07	0	0	0	0	0	0	0.000168775	0	0
ONION				Per kg onion	Per kg onion	Per kg onion
Average		1	kg CO2e	0.0661646	0.145515	0.381612
			kg CO2	0.0399895	0.107901	0.329325	0.00817054	0.03	0	0	0.00974122	0	0.02	0	0.0399895	0	0	0.107901	0.05	0.079
			kg CH4	0	4.31506e-06	5.99851e-06	2.73698e-11	0	0	0	4.31503e-06	0	0	0	0	0	0	4.31506e-06	0	0
			kg N2O	8.78358e-05	0.000125728	0.000174779	3.76302e-05	0	7.98508e-05	7.98508e-06	2.6175e-07	0	0	0	0	0	0	0.000125728	0	0
Sweden	Open-field	0.65	kg CO2e	0.0655589	0.140697	0.306799
			kg CO2	0.0399895	0.105638	0.258062	0.00768855	0.03	0	0	0.00796029	0	0.02	0	0.0399895	0	0	0.105638	0.05	0.03
			kg CH4	0	3.52616e-06	4.90184e-06	2.0584e-11	0	0	0	3.52614e-06	0	0	0	0	0	0	3.52616e-06	0	0
			kg N2O	8.58033e-05	0.000117246	0.000162987	3.12286e-05	0	7.8003e-05	7.8003e-06	2.13896e-07	0	0	0	0	0	0	0.000117246	0	0
The Netherlands	Open-field	0.21	kg CO2e	0.0674117	0.149342	0.45783
			kg CO2	0.0399895	0.106881	0.398803	0.00912898	0.03	0	0	0.00776276	0	0.02	0	0.0399895	0	0	0.106881	0.05	0.13
			kg CH4	0	3.43868e-06	4.78023e-06	4.0251e-11	0	0	0	3.43864e-06	0	0	0	0	0	0	3.43868e-06	0	0
			kg N2O	9.20209e-05	0.000142094	0.00019753	4.98647e-05	0	8.36553e-05	8.36553e-06	2.08588e-07	0	0	0	0	0	0	0.000142094	0	0
Rest of Europe	Open-field	0.14	kg CO2e	0.067106	0.16214	0.614634
			kg CO2	0.0399895	0.119938	0.555967	0.00897073	0.03	0	0	0.0209775	0	0.02	0	0.0399895	0	0	0.119938	0.05	0.23
			kg CH4	0	9.29237e-06	1.29176e-05	3.95532e-11	0	0	0	9.29233e-06	0	0	0	0	0	0	9.29237e-06	0	0
			kg N2O	9.0995e-05	0.000140559	0.000195396	4.90003e-05	0	8.27227e-05	8.27227e-06	5.63674e-07	0	0	0	0	0	0	0.000140559	0	0
LEEK				Per kg leek	Per kg leek	Per kg leek
Average		1	kg CO2e	0.0763592	0.175441	0.395561
			kg CO2	0.0399895	0.116794	0.325569	0.0152141	0.03	0	0	0.0115905	0	0.02	0	0.0399895	0	0	0.116794	0.05	0.106
			kg CH4	0	5.13426e-06	6.12754e-06	5.5649e-11	0	0	0	5.13421e-06	0	0	0	0	0	0	5.13426e-06	0	0
			kg N2O	0.000122046	0.000196216	0.000234175	7.38583e-05	0	0.000110951	1.10951e-05	3.11442e-07	0	0	0	0	0	0	0.000196216	0	0
Sweden	Open-field	0.35	kg CO2e	0.0848841	0.189647	0.321813
			kg CO2	0.0399895	0.12163	0.240637	0.0188597	0.03	0	0	0.0127808	0	0.02	0	0.0399895	0	0	0.12163	0.05	0.03
			kg CH4	0	5.66154e-06	6.75681e-06	5.04919e-11	0	0	0	5.66148e-06	0	0	0	0	0	0	5.66154e-06	0	0
			kg N2O	0.000150653	0.000227599	0.00027163	7.66025e-05	0	0.000136957	1.36957e-05	3.43426e-07	0	0	0	0	0	0	0.000227599	0	0
The Netherlands	Open-field	0.54	kg CO2e	0.0705673	0.164544	0.4112
			kg CO2	0.0399895	0.113166	0.349882	0.0126291	0.03	0	0	0.0105473	0	0.02	0	0.0399895	0	0	0.113166	0.05	0.13
			kg CH4	0	4.67215e-06	5.57603e-06	5.56836e-11	0	0	0	4.6721e-06	0	0	0	0	0	0	4.67215e-06	0	0
			kg N2O	0.00010261	0.000171877	0.000205128	6.89833e-05	0	9.3282e-05	9.3282e-06	2.8341e-07	0	0	0	0	0	0	0.000171877	0	0
Rest of Europe	Open-field	0.11	kg CO2e	0.0776671	0.183733	0.553447
			kg CO2	0.0399895	0.119218	0.476451	0.0163044	0.03	0	0	0.0129243	0	0.02	0	0.0399895	0	0	0.119218	0.05	0.23
			kg CH4	0	5.72512e-06	6.8327e-06	7.18884e-11	0	0	0	5.72505e-06	0	0	0	0	0	0	5.72512e-06	0	0
			kg N2O	0.000126435	0.000215841	0.000257597	8.90585e-05	0	0.000114941	1.14941e-05	3.47282e-07	0	0	0	0	0	0	0.000215841	0	0
BROCCOLI				Per kg broccoli	Per kg broccoli	Per kg broccoli
Average		1	kg CO2e	0.191807	0.378096	0.627875
			kg CO2	0.0399895	0.168896	0.378203	0.0422917	0.03	0	0	0.0366149	0	0.02	0	0.0399895	0	0	0.168896	0.05	0.098
			kg CH4	0	1.62193e-05	1.93571e-05	1.35422e-10	0	0	0	1.62192e-05	0	0	0	0	0	0	1.62193e-05	0	0
			kg N2O	0.000509453	0.000700164	0.000835617	0.000189727	0	0.000463139	4.63139e-05	9.83856e-07	0	0	0	0	0	0	0.000700164	0	0
Sweden	Open-field	0.66	kg CO2e	0.200946	0.395071	0.566978
			kg CO2	0.0399895	0.179036	0.30915	0.044659	0.03	0	0	0.044388	0	0.02	0	0.0399895	0	0	0.179036	0.05	0.03
			kg CH4	0	1.96625e-05	2.34664e-05	1.19563e-10	0	0	0	1.96624e-05	0	0	0	0	0	0	1.96625e-05	0	0
			kg N2O	0.000540121	0.000722706	0.00086252	0.000181392	0	0.000491019	4.91019e-05	1.19272e-06	0	0	0	0	0	0	0.000722706	0	0
Spain	Open-field	0.14	kg CO2e	0.186039	0.378427	0.785806
			kg CO2	0.0399895	0.157342	0.52195	0.0457922	0.03	0	0	0.0215602	0	0.02	0	0.0399895	0	0	0.157342	0.05	0.23
			kg CH4	0	9.55063e-06	1.13983e-05	2.01904e-10	0	0	0	9.55043e-06	0	0	0	0	0	0	9.55063e-06	0	0
			kg N2O	0.000490099	0.000740806	0.000884122	0.000250128	0	0.000445544	4.45544e-05	5.7933e-07	0	0	0	0	0	0	0.000740806	0	0
Rest of Europe	Open-field	0.2	kg CO2e	0.165685	0.321848	0.718281
			kg CO2	0.0399895	0.143521	0.505455	0.0320292	0.03	0	0	0.0215019	0	0.02	0	0.0399895	0	0	0.143521	0.05	0.23
			kg CH4	0	9.52478e-06	1.13674e-05	1.41222e-10	0	0	0	9.52463e-06	0	0	0	0	0	0	9.52478e-06	0	0
			kg N2O	0.000421797	0.000597326	0.000712885	0.000174951	0	0.000383452	3.83452e-05	5.77766e-07	0	0	0	0	0	0	0.000597326	0	0
WHITE CABBAGE				Per kg white cabbage	Per kg white cabbage	Per kg white cabbage
Average		1	kg CO2e	0.0739819	0.157816	0.359012
			kg CO2	0.0399895	0.108394	0.300028	0.0106239	0.03	0	0	0.0077804	0	0.02	0	0.0399895	0	0	0.108394	0.05	0.093
			kg CH4	0	3.44649e-06	4.11325e-06	3.83667e-11	0	0	0	3.44646e-06	0	0	0	0	0	0	3.44649e-06	0	0
			kg N2O	0.000114069	0.000165454	0.000197463	5.11763e-05	0	0.000103699	1.03699e-05	2.09062e-07	0	0	0	0	0	0	0.000165454	0	0
Sweden	Open-field	0.43	kg CO2e	0.0762285	0.160064	0.286507
			kg CO2	0.0399895	0.109854	0.226583	0.0113808	0.03	0	0	0.00848376	0	0.02	0	0.0399895	0	0	0.109854	0.05	0.03
			kg CH4	0	3.75805e-06	4.48508e-06	3.04689e-11	0	0	0	3.75802e-06	0	0	0	0	0	0	3.75805e-06	0	0
			kg N2O	0.000121608	0.000168061	0.000200574	4.62252e-05	0	0.000110552	1.10552e-05	2.27962e-07	0	0	0	0	0	0	0.000168061	0	0
Germany	Open-field	0.51	kg CO2e	0.0722872	0.155448	0.400344
			kg CO2	0.0399895	0.106635	0.342087	0.0100529	0.03	0	0	0.00659243	0	0.02	0	0.0399895	0	0	0.106635	0.05	0.13
			kg CH4	0	2.92027e-06	3.48522e-06	4.43246e-11	0	0	0	2.92023e-06	0	0	0	0	0	0	2.92027e-06	0	0
			kg N2O	0.000108381	0.00016347	0.000195095	5.49113e-05	0	9.85286e-05	9.85286e-06	1.77141e-07	0	0	0	0	0	0	0.00016347	0	0
Rest of Europe	Open-field	0.06	kg CO2e	0.0722872	0.161837	0.527315
			kg CO2	0.0399895	0.11288	0.468886	0.0100529	0.03	0	0	0.0128374	0	0.02	0	0.0399895	0	0	0.11288	0.05	0.23
			kg CH4	0	5.68659e-06	6.78671e-06	4.43246e-11	0	0	0	5.68654e-06	0	0	0	0	0	0	5.68659e-06	0	0
			kg N2O	0.000108381	0.000163638	0.000195295	5.49113e-05	0	9.85286e-05	9.85286e-06	3.44946e-07	0	0	0	0	0	0	0.000163638	0	0
CAULIFLOWER				Per kg cauliflower	Per kg cauliflower	Per kg cauliflower
Average		1	kg CO2e	0.121601	0.263263	0.531404
			kg CO2	0.0399895	0.13993	0.384211	0.0286663	0.03	0	0	0.0212743	0	0.02	0	0.0399895	0	0	0.13993	0.05	0.132
			kg CH4	0	9.42392e-06	1.12471e-05	1.03858e-10	0	0	0	9.42381e-06	0	0	0	0	0	0	9.42392e-06	0	0
			kg N2O	0.000273863	0.000412793	0.000492652	0.000138359	0	0.000248967	2.48967e-05	5.7165e-07	0	0	0	0	0	0	0.000412793	0	0
Sweden	Open-field	0.42	kg CO2e	0.12934	0.269299	0.416874
			kg CO2	0.0399895	0.141966	0.264907	0.0309809	0.03	0	0	0.0209952	0	0.02	0	0.0399895	0	0	0.141966	0.05	0.03
			kg CH4	0	9.30023e-06	1.10995e-05	8.29432e-11	0	0	0	9.30015e-06	0	0	0	0	0	0	9.30023e-06	0	0
			kg N2O	0.000299832	0.000426232	0.000508691	0.000125835	0	0.000272575	2.72575e-05	5.64148e-07	0	0	0	0	0	0	0.000426232	0	0
Spain	Open-field	0.27	kg CO2e	0.111258	0.24873	0.631019
			kg CO2	0.0399895	0.136443	0.497008	0.0248937	0.03	0	0	0.0215602	0	0.02	0	0.0399895	0	0	0.136443	0.05	0.23
			kg CH4	0	9.55054e-06	1.13982e-05	1.0976e-10	0	0	0	9.55043e-06	0	0	0	0	0	0	9.55054e-06	0	0
			kg N2O	0.000239158	0.000375713	0.000448398	0.000135976	0	0.000217416	2.17416e-05	5.7933e-07	0	0	0	0	0	0	0.000375713	0	0
France	Open-field	0.14	kg CO2e	0.120136	0.26765	0.534252
			kg CO2	0.0399895	0.140096	0.382022	0.0288226	0.03	0	0	0.0212842	0	0.02	0	0.0399895	0	0	0.140096	0.05	0.13
			kg CH4	0	9.42831e-06	1.12523e-05	1.27083e-10	0	0	0	9.42819e-06	0	0	0	0	0	0	9.42831e-06	0	0
			kg N2O	0.000268948	0.000426956	0.000509555	0.000157436	0	0.000244498	2.44498e-05	5.71915e-07	0	0	0	0	0	0	0.000426956	0	0
Rest of Europe	Open-field	0.17	kg CO2e	0.120113	0.267819	0.6538
			kg CO2	0.0399895	0.140302	0.501614	0.028811	0.03	0	0	0.0215019	0	0.02	0	0.0399895	0	0	0.140302	0.05	0.23
			kg CH4	0	9.52476e-06	1.13674e-05	1.27032e-10	0	0	0	9.52463e-06	0	0	0	0	0	0	9.52476e-06	0	0
			kg N2O	0.000268872	0.000426823	0.000509396	0.000157373	0	0.000244429	2.44429e-05	5.77766e-07	0	0	0	0	0	0	0.000426823	0	0
PEAS				Per kg peas	Per kg peas	Per kg peas
Sweden	Open-field	1	kg CO2e	0.364488	0.495019	0.617573
			kg CO2	0.238291	0.367006	0.480087	0	0.03	0	0	0.0787153	0	0.02	0	0.238291	0	0	0.367006	0.05	0.03
			kg CH4	0	3.48682e-05	3.74486e-05	0	0	0	0	3.48682e-05	0	0	0	0	0	0	3.48682e-05	0	0
			kg N2O	0.00042348	0.000425595	0.000457091	0	0	0.000384982	3.84982e-05	2.11511e-06	0	0	0	0	0	0	0.000425595	0	0
BEANS				Per kg beans	Per kg beans	Per kg beans
Average		1	kg CO2e	0.482009	0.830864	1.15989
			kg CO2	0.248916	0.522573	0.82216	0.0452751	0.03	0	0	0.123827	0	0.02	0.042875	0.238291	0	0	0.522573	0.05	0.177
			kg CH4	0	7.21059e-05	7.92121e-05	1.77047e-10	0	0	0	5.4851e-05	0	0	1.4177e-05	0	0	0	7.21059e-05	0	0
			kg N2O	0.000782192	0.00102631	0.00112429	0.000229046	0	0.000680732	6.80732e-05	3.32727e-06	0	0	1.32161e-06	0	0	0	0.00102631	0	0
Sweden	Open-field	0.6	kg CO2e	0.401113	0.67662	0.812613
			kg CO2	0.248916	0.475102	0.596182	0.0365542	0.03	0	0	0.090831	0	0.02	0.039147	0.238291	0	0	0.475102	0.05	0.03
			kg CH4	0	5.68381e-05	6.10444e-05	9.78643e-11	0	0	0	4.02351e-05	0	0	1.4177e-05	0	0	0	5.68381e-05	0	0
			kg N2O	0.000510728	0.00066975	0.000719314	0.000148472	0	0.00044448	4.4448e-05	2.44066e-06	0	0	1.32161e-06	0	0	0	0.00066975	0	0
Turkey	Open-field	0.13	kg CO2e	0.674894	1.04009	1.52518
			kg CO2	0.248916	0.498709	0.943737	0.0661958	0.03	0	0	0.0800663	0	0.02	0.0428694	0.238291	0	0	0.498709	0.05	0.33
			kg CH4	0	5.18574e-05	5.5695e-05	2.91867e-10	0	0	0	3.54667e-05	0	0	1.4177e-05	0	0	0	5.18574e-05	0	0
			kg N2O	0.00142946	0.00181079	0.00194479	0.000361578	0	0.00124404	0.000124404	2.15141e-06	0	0	1.32161e-06	0	0	0	0.00181079	0	0
Rest of the world	Open-field	0.27	kg CO2e	0.568907	1.07289	1.75574
			kg CO2	0.248916	0.639553	1.2658	0.0545818	0.03	0	0	0.21822	0	0.02	0.0511621	0.238291	0	0	0.639553	0.05	0.43
			kg CH4	0	0.000115783	0.000130908	2.97726e-10	0	0	0	9.66641e-05	0	0	1.4177e-05	0	0	0	0.000115783	0	0
			kg N2O	0.0010738	0.00144094	0.00162916	0.000344287	0	0.000934513	9.34513e-05	5.86366e-06	0	0	1.32161e-06	0	0	0	0.00144094	0	0

## Sheet: Fruits, berries, cocoa, coffee
Results fruits, berries, cocoa and coffee				Choice of climate metric:	GWP100 with fb
				Include land use change?	Yes
				Include soil carbon changes? Go to: "Common input data" --> "Choose factors for soil carbon changes"	Yes
				RESULTS					Soil emissions
	Production system	Share of market	Emissions	Agricultural emissions only	To farm-gate	To retail-gate	Production of mineral fertilizer	Production of capital goods	Direct emissions	Indirect emissions	Diesel use machinery	Energy use in greenhouses	Energy use for irrigation	Energy use for drying	Soil carbon emissions	LUC emissions	Energy use processing	Total after processing	Packaging	Transportation
APPLE				Per kg apple	Per kg apple	Per kg apple
Average		1	kg CO2e	-0.081935	0.0717487	0.369673
			kg CO2	-0.091139	0.0541104	0.348622	0.00467797	0.03	0	0	0.0605714	0	0.05	0	-0.091139	0	0	0.0541104	0.05	0.188
			kg CH4	0	2.68311e-05	3.20219e-05	1.82292e-11	0	0	0	2.68311e-05	0	0	0	0	0	0	2.68311e-05	0	0
			kg N2O	3.08862e-05	5.61279e-05	6.69864e-05	2.36141e-05	0	2.80784e-05	2.80784e-06	1.62758e-06	0	0	0	0	0	0	5.61279e-05	0	0
Sweden	Open-field	0.21	kg CO2e	-0.0776127	0.0887457	0.201391
			kg CO2	-0.091139	0.0656246	0.173797	0.00658957	0.03	0	0	0.0701741	0	0.05	0	-0.091139	0	0	0.0656246	0.05	0.03
			kg CH4	0	3.10848e-05	3.70984e-05	1.76418e-11	0	0	0	3.10847e-05	0	0	0	0	0	0	3.10848e-05	0	0
			kg N2O	4.53905e-05	7.4041e-05	8.83649e-05	2.67649e-05	0	4.12641e-05	4.12641e-06	1.8856e-06	0	0	0	0	0	0	7.4041e-05	0	0
Italy	Open-field	0.3	kg CO2e	-0.0847361	0.0339603	0.374699
			kg CO2	-0.091139	0.0214858	0.359811	0.00331458	0.03	0	0	0.0293103	0	0.05	0	-0.091139	0	0	0.0214858	0.05	0.23
			kg CH4	0	1.29835e-05	1.54953e-05	1.46145e-11	0	0	0	1.29835e-05	0	0	0	0	0	0	1.29835e-05	0	0
			kg N2O	2.14865e-05	4.03792e-05	4.81909e-05	1.81051e-05	0	1.95332e-05	1.95332e-06	7.8758e-07	0	0	0	0	0	0	4.03792e-05	0	0
Rest of Europe	Open-field	0.49	kg CO2e	-0.0820724	0.0876001	0.438716
			kg CO2	-0.091139	0.0691499	0.416696	0.00469345	0.03	0	0	0.0755955	0	0.05	0	-0.091139	0	0	0.0691499	0.05	0.23
			kg CH4	0	3.34863e-05	3.99645e-05	2.06941e-11	0	0	0	3.34862e-05	0	0	0	0	0	0	3.34863e-05	0	0
			kg N2O	3.04249e-05	5.8093e-05	6.93316e-05	2.56368e-05	0	2.7659e-05	2.7659e-06	2.03128e-06	0	0	0	0	0	0	5.8093e-05	0	0
PEAR				Per kg pear	Per kg pear	Per kg pear
Average		1	kg CO2e	-0.0462283	0.137434	0.399295
			kg CO2	-0.091139	0.0567128	0.302957	0.0214618	0.03	0	0	0.04639	0	0.05	0	-0.091139	0	0	0.0567128	0.05	0.147135
			kg CH4	0	2.05493e-05	2.45248e-05	9.38249e-11	0	0	0	2.05492e-05	0	0	0	0	0	0	2.05493e-05	0	0
			kg N2O	0.000150707	0.000268534	0.000320484	0.00011658	0	0.000137006	1.37006e-05	1.24652e-06	0	0	0	0	0	0	0.000268534	0	0
Sweden	Open-field	0.0558773	kg CO2e	-0.0740987	0.109041	0.225613
			kg CO2	-0.091139	0.0800413	0.191003	0.00830144	0.03	0	0	0.0828789	0	0.05	0	-0.091139	0	0	0.0800413	0.05	0.03
			kg CH4	0	3.67126e-05	4.3815e-05	2.22249e-11	0	0	0	3.67126e-05	0	0	0	0	0	0	3.67126e-05	0	0
			kg N2O	5.71822e-05	9.31272e-05	0.000111144	3.3718e-05	0	5.19839e-05	5.19839e-06	2.22699e-06	0	0	0	0	0	0	9.31272e-05	0	0
Belgium	Open-field	0.230618	kg CO2e	-0.0848479	0.0362262	0.258057
			kg CO2	-0.091139	0.0258467	0.24567	0.00201606	0.03	0	0	0.0349697	0	0.05	0	-0.091139	0	0	0.0258467	0.05	0.13
			kg CH4	0	1.54904e-05	1.84872e-05	8.8891e-12	0	0	0	1.54904e-05	0	0	0	0	0	0	1.54904e-05	0	0
			kg N2O	2.11114e-05	3.30633e-05	3.94597e-05	1.10122e-05	0	1.91922e-05	1.91922e-06	9.39649e-07	0	0	0	0	0	0	3.30633e-05	0	0
The Netherlands	Open-field	0.486276	kg CO2e	-0.0316039	0.158043	0.40344
			kg CO2	-0.091139	0.0509413	0.275619	0.0287496	0.03	0	0	0.0333307	0	0.05	0	-0.091139	0	0	0.0509413	0.05	0.13
			kg CH4	0	1.47645e-05	1.76209e-05	1.26761e-10	0	0	0	1.47644e-05	0	0	0	0	0	0	1.47645e-05	0	0
			kg N2O	0.000199782	0.000357715	0.000426919	0.000157038	0	0.00018162	1.8162e-05	8.9561e-07	0	0	0	0	0	0	0.000357715	0	0
Rest of Europe	Open-field	0.227229	kg CO2e	-0.0314758	0.203032	0.57648
			kg CO2	-0.091139	0.0946535	0.447134	0.0288377	0.03	0	0	0.0769548	0	0.05	0	-0.091139	0	0	0.0946535	0.05	0.23
			kg CH4	0	3.40885e-05	4.06833e-05	1.2715e-10	0	0	0	3.40884e-05	0	0	0	0	0	0	3.40885e-05	0	0
			kg N2O	0.000200212	0.000359798	0.000429405	0.000157519	0	0.000182011	1.82011e-05	2.06781e-06	0	0	0	0	0	0	0.000359798	0	0
MELON				Per kg melon	Per kg melon	Per kg melon
Average		1	kg CO2e	-0.0372142	1.60615	2.14124
			kg CO2	-0.0565062	1.47103	1.97998	0.00994149	0.03	0	0	0.0177607	1.43883	0.031	0	-0.0565062	0	0	1.47103	0.05	0.138
			kg CH4	0	0.00231313	0.00276063	3.796e-11	0	0	0	7.86739e-06	0.00230526	0	0	0	0	0	0.00231313	0	0
			kg N2O	6.47382e-05	0.000189505	0.000226167	4.95532e-05	0	5.98375e-05	4.90068e-06	4.77237e-07	7.47368e-05	0	0	0	0	0	0.000189505	0	0
Sweden	Greenhouse	0.38	kg CO2e	0.01747	4.11846	5.01069
			kg CO2	0	3.82532	4.66084	0.00892453	0.03	0	0	0	3.78639	0	0	0	0	0	3.82532	0.05	0.03
			kg CH4	0	0.00606648	0.0072401	2.38931e-11	0	0	0	0	0.00606648	0	0	0	0	0	0.00606648	0	0
			kg N2O	5.86241e-05	0.000291549	0.000347952	3.62488e-05	0	5.58857e-05	2.7384e-06	0	0.000196676	0	0	0	0	0	0.000291549	0	0
Spain	Open-field	0.34	kg CO2e	-0.0689776	0.0673071	0.414497
			kg CO2	-0.091139	0.0258825	0.365058	0.0114721	0.03	0	0	0.0255494	0	0.05	0	-0.091139	0	0	0.0258825	0.05	0.23
			kg CH4	0	1.13176e-05	1.35071e-05	5.05823e-11	0	0	0	1.13175e-05	0	0	0	0	0	0	1.13176e-05	0	0
			kg N2O	7.43673e-05	0.000137717	0.00016436	6.26636e-05	0	6.76066e-05	6.76066e-06	6.86523e-07	0	0	0	0	0	0	0.000137717	0	0
The Netherlands	Open-field	0.16	kg CO2e	-0.0728274	0.0598504	0.286252
			kg CO2	-0.091139	0.0254829	0.245236	0.00947921	0.03	0	0	0.0271427	0	0.05	0	-0.091139	0	0	0.0254829	0.05	0.13
			kg CH4	0	1.20234e-05	1.43494e-05	4.17952e-11	0	0	0	1.20233e-05	0	0	0	0	0	0	1.20234e-05	0	0
			kg N2O	6.14484e-05	0.000113955	0.000136001	5.17778e-05	0	5.58621e-05	5.58621e-06	7.29336e-07	0	0	0	0	0	0	0.000113955	0	0
Rest of Europe	Open-field	0.12	kg CO2e	-0.0729004	0.0722441	0.420389
			kg CO2	-0.091139	0.0377278	0.379195	0.00944143	0.03	0	0	0.0394254	0	0.05	0	-0.091139	0	0	0.0377278	0.05	0.23
			kg CH4	0	1.74642e-05	2.08428e-05	4.16286e-11	0	0	0	1.74641e-05	0	0	0	0	0	0	1.74642e-05	0	0
			kg N2O	6.12034e-05	0.000113834	0.000135857	5.15714e-05	0	5.56395e-05	5.56395e-06	1.05938e-06	0	0	0	0	0	0	0.000113834	0	0
BANANA				Per kg banana	Per kg banana	Per kg banana
Average		1	kg CO2e	-0.0754	0.0347575	0.672615
			kg CO2	-0.091139	0.00553108	0.629109	0.0070573	0.03	0	0	0.00961283	0	0.05	0	-0.091139	0	0	0.00553108	0.05	0.378
			kg CH4	0	4.2582e-06	6.09829e-06	3.84953e-11	0	0	0	4.25816e-06	0	0	0	0	0	0	4.2582e-06	0	0
			kg N2O	5.28157e-05	9.75896e-05	0.000145298	4.45155e-05	0	4.80143e-05	4.80143e-06	2.58301e-07	0	0	0	0	0	0	9.75896e-05	0	0
Costa Rica	Open-field	0.22	kg CO2e	-0.0787252	0.0185149	0.614992
			kg CO2	-0.091139	-0.00177649	0.583678	0.00412659	0.03	0	0	0.00523596	0	0.05	0	-0.091139	0	0	-0.00177649	0.05	0.33
			kg CH4	0	2.31938e-06	3.57929e-06	2.25092e-11	0	0	0	2.31936e-06	0	0	0	0	0	0	2.31938e-06	0	0
			kg N2O	4.16572e-05	6.78273e-05	0.000104672	2.60294e-05	0	3.78702e-05	3.78702e-06	1.40692e-07	0	0	0	0	0	0	6.78273e-05	0	0
Ecuador	Open-field	0.15	kg CO2e	-0.0497286	0.102193	0.744126
			kg CO2	-0.091139	0.0187308	0.615325	0.0222785	0.03	0	0	0.00759135	0	0.05	0	-0.091139	0	0	0.0187308	0.05	0.33
			kg CH4	0	3.36283e-06	5.18956e-06	1.21522e-10	0	0	0	3.36271e-06	0	0	0	0	0	0	3.36283e-06	0	0
			kg N2O	0.000138961	0.000279692	0.000431624	0.000140527	0	0.000126329	1.26329e-05	2.03983e-07	0	0	0	0	0	0	0.000279692	0	0
Panama	Open-field	0.15	kg CO2e	-0.0803307	0.0199047	0.617137
			kg CO2	-0.091139	0.000522731	0.587226	0.00447293	0.03	0	0	0.00718885	0	0.05	0	-0.091139	0	0	0.000522731	0.05	0.33
			kg CH4	0	3.18444e-06	4.91426e-06	2.43983e-11	0	0	0	3.18442e-06	0	0	0	0	0	0	3.18444e-06	0	0
			kg N2O	3.62696e-05	6.46768e-05	9.98098e-05	2.8214e-05	0	3.29724e-05	3.29724e-06	1.93167e-07	0	0	0	0	0	0	6.46768e-05	0	0
Rest of the world	Open-field	0.48	kg CO2e	-0.0803574	0.0257699	0.694014
			kg CO2	-0.091139	0.00632058	0.667326	0.00445152	0.03	0	0	0.0130081	0	0.05	0	-0.091139	0	0	0.00632058	0.05	0.43
			kg CH4	0	5.76217e-06	7.90682e-06	2.42816e-11	0	0	0	5.76215e-06	0	0	0	0	0	0	5.76217e-06	0	0
			kg N2O	3.61802e-05	6.46087e-05	8.86557e-05	2.8079e-05	0	3.28911e-05	3.28911e-06	3.49533e-07	0	0	0	0	0	0	6.46087e-05	0	0
ORANGE				Per kg orange	Per kg orange	Per kg orange
Average		1	kg CO2e	-0.0337086	0.156629	0.728614
			kg CO2	-0.091139	0.0461815	0.585582	0.0296522	0.03	0	0	0.0276684	0	0.05	0	-0.091139	0	0	0.0461815	0.05	0.348
			kg CH4	0	1.22563e-05	1.60044e-05	1.47806e-10	0	0	0	1.22562e-05	0	0	0	0	0	0	1.22563e-05	0	0
			kg N2O	0.00019272	0.000369231	0.00047815	0.000175768	0	0.0001752	1.752e-05	7.4346e-07	0	0	0	0	0	0	0.000369231	0	0
Spain	Open-field	0.41	kg CO2e	-0.028335	0.162738	0.52839
			kg CO2	-0.091139	0.0464356	0.389588	0.0325113	0.03	0	0	0.0250634	0	0.05	0	-0.091139	0	0	0.0464356	0.05	0.23
			kg CH4	0	1.11024e-05	1.32502e-05	1.43347e-10	0	0	0	1.11022e-05	0	0	0	0	0	0	1.11024e-05	0	0
			kg N2O	0.000210752	0.00038901	0.000464268	0.000177584	0	0.000191593	1.91593e-05	6.73463e-07	0	0	0	0	0	0	0.00038901	0	0
Rest of the world	Open-field	0.59	kg CO2e	-0.0374428	0.152384	0.867753
			kg CO2	-0.091139	0.0460049	0.721781	0.0276654	0.03	0	0	0.0294786	0	0.05	0	-0.091139	0	0	0.0460049	0.05	0.43
			kg CH4	0	1.30582e-05	1.79184e-05	1.50906e-10	0	0	0	1.3058e-05	0	0	0	0	0	0	1.30582e-05	0	0
			kg N2O	0.000180189	0.000355486	0.000487796	0.000174506	0	0.000163808	1.63808e-05	7.92102e-07	0	0	0	0	0	0	0.000355486	0	0
LEMON				Per kg lemon	Per kg lemon	Per kg lemon
Average		1	kg CO2e	-0.054693	0.102394	0.456372
			kg CO2	-0.091139	0.0367833	0.378068	0.0174859	0.03	0	0	0.0304365	0	0.05	0	-0.091139	0	0	0.0367833	0.05	0.23
			kg CH4	0	1.34824e-05	1.60907e-05	7.70977e-11	0	0	0	1.34823e-05	0	0	0	0	0	0	1.34824e-05	0	0
			kg N2O	0.000122302	0.000218632	0.000260929	9.55121e-05	0	0.000111184	1.11184e-05	8.1784e-07	0	0	0	0	0	0	0.000218632	0	0
Spain	Open-field	0.43	kg CO2e	-0.0289792	0.160955	0.526262
			kg CO2	-0.091139	0.045845	0.388883	0.0321778	0.03	0	0	0.0248063	0	0.05	0	-0.091139	0	0	0.045845	0.05	0.23
			kg CH4	0	1.09885e-05	1.31143e-05	1.41877e-10	0	0	0	1.09884e-05	0	0	0	0	0	0	1.09885e-05	0	0
			kg N2O	0.00020859	0.00038502	0.000459506	0.000175763	0	0.000189628	1.89628e-05	6.66555e-07	0	0	0	0	0	0	0.00038502	0	0
Rest of Europe	Open-field	0.57	kg CO2e	-0.0740911	0.0582168	0.403648
			kg CO2	-0.091139	0.0299472	0.36991	0.00640248	0.03	0	0	0.0346838	0	0.05	0	-0.091139	0	0	0.0299472	0.05	0.23
			kg CH4	0	1.53638e-05	1.8336e-05	2.82295e-11	0	0	0	1.53637e-05	0	0	0	0	0	0	1.53638e-05	0	0
			kg N2O	5.72078e-05	9.31117e-05	0.000111125	3.49719e-05	0	5.2007e-05	5.2007e-06	9.31966e-07	0	0	0	0	0	0	9.31117e-05	0	0
AVOCADO				Per kg avocado	Per kg avocado	Per kg avocado
World average	Open-field	1	kg CO2e	-0.0135753	0.316861	1.09345
			kg CO2	-0.091139	0.160178	0.878448	0.0417287	0.03	0	0	0.029588	0	0.15	0	-0.091139	0	0	0.160178	0.05	0.43
			kg CH4	0	1.31067e-05	1.79849e-05	2.27616e-10	0	0	0	1.31065e-05	0	0	0	0	0	0	1.31067e-05	0	0
			kg N2O	0.000260281	0.000524289	0.000719426	0.000263213	0	0.000236619	2.36619e-05	7.9504e-07	0	0	0	0	0	0	0.000524289	0	0
KIWIFRUIT				Per kg kiwifruit	Per kg kiwifruit	Per kg kiwifruit
Average		1	kg CO2e	-0.0679999	0.103033	0.632535
			kg CO2	-0.091139	0.0571072	0.573345	0.0122189	0.03	0	0	0.0560273	0	0.05	0	-0.091139	0	0	0.0571072	0.05	0.332
			kg CH4	0	2.48183e-05	3.20165e-05	6.05335e-11	0	0	0	2.48182e-05	0	0	0	0	0	0	2.48183e-05	0	0
			kg N2O	7.76483e-05	0.000151281	0.000194973	7.21273e-05	0	7.05894e-05	7.05894e-06	1.50548e-06	0	0	0	0	0	0	0.000151281	0	0
Italy	Open-field	0.49	kg CO2e	-0.0680743	0.0970715	0.45002
			kg CO2	-0.091139	0.0533594	0.397851	0.0119397	0.03	0	0	0.0525587	0	0.05	0	-0.091139	0	0	0.0533594	0.05	0.23
			kg CH4	0	2.32818e-05	2.77859e-05	5.2644e-11	0	0	0	2.32817e-05	0	0	0	0	0	0	2.32818e-05	0	0
			kg N2O	7.73985e-05	0.000144029	0.000171892	6.52178e-05	0	7.03623e-05	7.03623e-06	1.41227e-06	0	0	0	0	0	0	0.000144029	0	0
Rest of the world	Open-field	0.51	kg CO2e	-0.0679283	0.10876	0.807893
			kg CO2	-0.091139	0.0607081	0.741956	0.0124872	0.03	0	0	0.0593599	0	0.05	0	-0.091139	0	0	0.0607081	0.05	0.43
			kg CH4	0	2.62945e-05	3.60812e-05	6.81135e-11	0	0	0	2.62944e-05	0	0	0	0	0	0	2.62945e-05	0	0
			kg N2O	7.78883e-05	0.000158249	0.000217148	7.87658e-05	0	7.08075e-05	7.08075e-06	1.59502e-06	0	0	0	0	0	0	0.000158249	0	0
STRAWBERRY				Per kg strawberry	Per kg strawberry	Per kg strawberry
Average		1	kg CO2e	-0.0597082	0.390863	0.738588
			kg CO2	-0.0833922	0.314214	0.647111	0.0118193	0.03	0	0	0.095553	0.214484	0.04575	0	-0.0833922	0	0	0.314214	0.15	0.078
			kg CH4	0	0.00101076	0.0012063	3.71766e-11	0	0	0	4.23267e-05	0.000968435	0	0	0	0	0	0.00101076	0	0
			kg N2O	7.94766e-05	0.000141888	0.000169338	5.24813e-05	0	7.28343e-05	6.64229e-06	2.56755e-06	7.36248e-06	0	0	0	0	0	0.000141888	0	0
Sweden	Open-field	0.69	kg CO2e	-0.0654824	0.165969	0.4129
			kg CO2	-0.091139	0.122392	0.360893	0.012499	0.03	0	0	0.121032	0	0.05	0	-0.091139	0	0	0.122392	0.15	0.03
			kg CH4	0	5.36131e-05	6.39851e-05	3.34628e-11	0	0	0	5.3613e-05	0	0	0	0	0	0	5.36131e-05	0	0
			kg N2O	8.60962e-05	0.000140116	0.000167222	5.07673e-05	0	7.82692e-05	7.82692e-06	3.25217e-06	0	0	0	0	0	0	0.000140116	0	0
Belgium	Open-field	0.14	kg CO2e	-0.0731485	0.065837	0.412743
			kg CO2	-0.091139	0.0319091	0.372251	0.009313	0.03	0	0	0.0337351	0	0.05	0	-0.091139	0	0	0.0319091	0.15	0.13
			kg CH4	0	1.49436e-05	1.78345e-05	4.10624e-11	0	0	0	1.49435e-05	0	0	0	0	0	0	1.49436e-05	0	0
			kg N2O	6.03709e-05	0.000112147	0.000133843	5.08699e-05	0	5.48826e-05	5.48826e-06	9.06476e-07	0	0	0	0	0	0	0.000112147	0	0
Rest of Europe	Greenhouse	0.085	kg CO2e	0.0224778	3.02264	4.06091
			kg CO2	0	2.56614	3.5161	0.0127995	0.03	0	0	0	2.52334	0	0	0	0	0	2.56614	0.15	0.23
			kg CH4	0	0.0113933	0.0135975	5.64347e-11	0	0	0	0	0.0113933	0	0	0	0	0	0.0113933	0	0
			kg N2O	7.54288e-05	0.00023196	0.000276835	6.99139e-05	0	7.54288e-05	0	0	8.66175e-05	0	0	0	0	0	0.00023196	0	0
Rest of Europe	Open-field	0.085	kg CO2e	-0.0728844	0.120028	0.596763
			kg CO2	-0.091139	0.0844055	0.554249	0.00944975	0.03	0	0	0.0860948	0	0.05	0	-0.091139	0	0	0.0844055	0.15	0.23
			kg CH4	0	3.81372e-05	4.55152e-05	4.16653e-11	0	0	0	3.81371e-05	0	0	0	0	0	0	3.81372e-05	0	0
			kg N2O	6.12574e-05	0.000115188	0.000137472	5.16169e-05	0	5.56885e-05	5.56885e-06	2.3134e-06	0	0	0	0	0	0	0.000115188	0	0
RASPBERRY				Per kg raspberry	Per kg raspberry	Per kg raspberry
Average		1	kg CO2e	0.0137869	0.38437	0.759482
			kg CO2	-0.091139	0.204414	0.544712	0.0522485	0.03	0	0	0.163305	0	0.05	0	-0.091139	0	0	0.204414	0.15	0.102
			kg CH4	0	7.23388e-05	8.63334e-05	1.73168e-10	0	0	0	7.23386e-05	0	0	0	0	0	0	7.23388e-05	0	0
			kg N2O	0.000352101	0.000595624	0.000710853	0.000239135	0	0.000320091	3.20091e-05	4.38807e-06	0	0	0	0	0	0	0.000595624	0	0
Sweden	Open-field	0.44	kg CO2e	0.0629484	0.554225	0.876267
			kg CO2	-0.091139	0.303746	0.577331	0.075066	0.03	0	0	0.239819	0	0.05	0	-0.091139	0	0	0.303746	0.15	0.03
			kg CH4	0	0.000106232	0.000126784	2.00969e-10	0	0	0	0.000106232	0	0	0	0	0	0	0.000106232	0	0
			kg N2O	0.000517072	0.000828411	0.000988676	0.000304896	0	0.000470065	4.70065e-05	6.44403e-06	0	0	0	0	0	0	0.000828411	0	0
Belgium	Open-field	0.15	kg CO2e	-0.0470745	0.163029	0.528737
			kg CO2	-0.091139	0.0802527	0.429947	0.0228105	0.03	0	0	0.0685813	0	0.05	0	-0.091139	0	0	0.0802527	0.15	0.13
			kg CH4	0	3.03793e-05	3.62565e-05	1.00575e-10	0	0	0	3.03792e-05	0	0	0	0	0	0	3.03793e-05	0	0
			kg N2O	0.000147868	0.000274307	0.000327374	0.000124597	0	0.000134425	1.34425e-05	1.84281e-06	0	0	0	0	0	0	0.000274307	0	0
The Netherlands	Open-field	0.25	kg CO2e	-0.028867	0.234996	0.614627
			kg CO2	-0.091139	0.118016	0.475016	0.0322358	0.03	0	0	0.0969191	0	0.05	0	-0.091139	0	0	0.118016	0.15	0.13
			kg CH4	0	4.29321e-05	5.12377e-05	1.42132e-10	0	0	0	4.29319e-05	0	0	0	0	0	0	4.29321e-05	0	0
			kg N2O	0.000208967	0.000387651	0.000462646	0.00017608	0	0.00018997	1.8997e-05	2.60426e-06	0	0	0	0	0	0	0.000387651	0	0
Rest of Europe	Open-field	0.16	kg CO2e	0.00229725	0.358174	0.880982
			kg CO2	-0.091139	0.182652	0.671503	0.0483684	0.03	0	0	0.145423	0	0.05	0	-0.091139	0	0	0.182652	0.15	0.23
			kg CH4	0	6.44176e-05	7.68798e-05	2.13263e-10	0	0	0	6.44173e-05	0	0	0	0	0	0	6.44176e-05	0	0
			kg N2O	0.000313545	0.000581652	0.000694178	0.0002642	0	0.000285041	2.85041e-05	3.90756e-06	0	0	0	0	0	0	0.000581652	0	0
COCOA				Per kg cocoa	Per kg cocoa
Ivory Coast	Open-field	1	kg CO2e	0.438938	2.81009
			kg CO2	-0.210759	1.56361		0.137293	0.03	0	0	0	0	0.6	0	-0.091139	0	0.2
			kg CH4	0	1.7318e-09		7.48886e-10	0	0	0	0	0	0	0	0	0	0
			kg N2O	0.00218019	0.00418283		0.000866004	0	0.000857077	8.57077e-05	0	0	0	0	0	0	0
COCOA POWDER				Per kg cocoa	Per kg cocoa	Per kg cocoa powder
Ivory Coast	Open-field	1	kg CO2e	0.438938	2.81009	4.43715												Per kg cocoa powder
			kg CO2	-0.210759	1.56361	2.8559												1.37424	0.05	0.33
			kg CH4	0	1.7318e-09	2.19691e-09												1.34945e-09	0	0
			kg N2O	0.00218019	0.00418283	0.00530622												0.00325934	0	0
COCOA BUTTER				Per kg cocoa	Per kg cocoa	Per kg cocoa butter
Ivory Coast	Open-field	1	kg CO2e	0.438938	2.81009	8.78602												Per kg cocoa butter
			kg CO2	-0.210759	1.56361	5.40389												2.93934	0.05	0.33
			kg CH4	0	1.7318e-09	4.69895e-09												2.88633e-09	0	0
			kg N2O	0.00218019	0.00418283	0.0113494												0.00697138	0	0
COFFEE				Per kg coffee bean	Per kg coffee bean	Per kg milled coffee
Average		1	kg CO2e	0.877455	3.94881	6.40623
			kg CO2	-0.163139	1.98181	3.59373	0.266613	0.03	0	0	0.387096	0	0.4	0.114586	-0.091139	0	0.1	2.08181	0.05	0.396
			kg CH4	0	0.000391455	0.000554648	1.45429e-09	0	0	0	0.00017147	0	0	4.72181e-05	0	0	0	0.000391455	0	0
			kg N2O	0.00349192	0.00655601	0.00937462	0.00168172	0	0.00177345	0.000177345	1.04014e-05	0	0	1.96523e-05	0	0	0	0.00655601	0	0
Brazil	Open-field	0.34	kg CO2e	0.871413	3.62148	6.32945
			kg CO2	-0.163139	1.67135	3.31999	0.264797	0.03	0	0	0.272891	0	0.4	0.057166	-0.091139	0	0.1	1.77135	0.05	0.33
			kg CH4	0	0.000300901	0.000464353	1.44438e-09	0	0	0	0.000120882	0	0	4.72181e-05	0	0	0	0.000300901	0	0
			kg N2O	0.00347165	0.00650974	0.0100459	0.00167027	0	0.00176315	0.000176315	7.33269e-06	0	0	1.96523e-05	0	0	0	0.00650974	0	0
Rest of the world	Open-field	0.66	kg CO2e	0.880567	4.11743	6.44578
			kg CO2	-0.163139	2.14174	3.73476	0.267549	0.03	0	0	0.445928	0	0.4	0.144165	-0.091139	0	0.1	2.24174	0.05	0.43
			kg CH4	0	0.000438104	0.000601163	1.45939e-09	0	0	0	0.000197531	0	0	4.72181e-05	0	0	0	0.000438104	0	0
			kg N2O	0.00350237	0.00657984	0.00902882	0.00168762	0	0.00177876	0.000177876	1.19823e-05	0	0	1.96523e-05	0	0	0	0.00657984	0	0

## Sheet: Processed products
Results processed products			Choice of climate metric:	GWP100 with fb
			Include land use change?	Yes
			Include soil carbon changes? Go to: "Common input data" --> "Choose factors for soil carbon changes"	Yes
			RESULTS
	Market share	Emissions	Agricultural emissions only	To farm-gate	To retail-gate	Input products	Energy use processing	Packaging	Transportation
PASTA					Per kg pasta
Average	1	kg CO2e			1.76572
		kg CO2			1.20324	0.742289	0.17749	0.05	0.2094
		kg CH4			6.19858e-05	6.0746e-05	0	0	0
		kg N2O			0.00188043	0.00184282	0	0	0
Sweden	0.3	kg CO2e			1.46277
		kg CO2			0.900295	0.742289	0.06	0.05	0.03
		kg CH4			6.19858e-05	6.0746e-05	0	0	0
		kg N2O			0.00188043	0.00184282	0	0	0
Italy	0.503	kg CO2e			1.7893
		kg CO2			1.22683	0.742289	0.18	0.05	0.23
		kg CH4			6.19858e-05	6.0746e-05	0	0	0
		kg N2O			0.00188043	0.00184282	0	0	0
Rest of the world	0.197	kg CO2e			2.16685
		kg CO2			1.60438	0.742289	0.35	0.05	0.43
		kg CH4			6.19858e-05	6.0746e-05	0	0	0
		kg N2O			0.00188043	0.00184282	0	0	0
BUNS					Per kg buns
Sweden	1	kg CO2e			1.44776
		kg CO2			0.769018	0.373637	0.3	0.05	0.03
		kg CH4			0.00988405	0.00968637	0	0	0
		kg N2O			0.00114996	0.00112696	0	0	0
BISCUITS					Per kg biscuits
Sweden	1	kg CO2e			1.10428
		kg CO2			0.776214	0.38069	0.3	0.05	0.03
		kg CH4			0.000757996	0.000742836	0	0	0
		kg N2O			0.00101439	0.000994105	0	0	0
PASTRY					Per kg pastry
Sweden	1	kg CO2e			1.40986
		kg CO2			0.939104	0.540322	0.3	0.05	0.03
		kg CH4			0.00185208	0.00181504	0	0	0
		kg N2O			0.0013684	0.00134103	0	0	0
RUSKS					Per kg rusks
Sweden	1	kg CO2e			1.43383
		kg CO2			0.977027	0.577487	0.3	0.05	0.03
		kg CH4			5.30682e-05	5.20068e-05	0	0	0
		kg N2O			0.00152685	0.00149631	0	0	0
WHEAT BREAD					Per kg wheat bread
Sweden	1	kg CO2e			1.02195
		kg CO2			0.747831	0.352874	0.3	0.05	0.03
		kg CH4			3.11628e-05	3.05395e-05	0	0	0
		kg N2O			0.000916299	0.000897973	0	0	0
WHEAT-RYE BREAD					Per kg wheat-rye bread
Sweden	1	kg CO2e			1.04307
		kg CO2			0.77509	0.379588	0.3	0.05	0.03
		kg CH4			3.34526e-05	3.27836e-05	0	0	0
		kg N2O			0.000895454	0.000877545	0	0	0
CRISP BREAD					Per kg crisp bread
Sweden	1	kg CO2e			1.11435
		kg CO2			0.837917	0.441158	0.3	0.05	0.03
		kg CH4			3.84435e-05	3.76747e-05	0	0	0
		kg N2O			0.000923234	0.000904769	0	0	0
FOLLOW-UP FORMULA					Per kg follow-up formula (powder)
Sweden	1	kg CO2e			3.65896
		kg CO2			1.10231	1.0168	0	0.05	0.03
		kg CH4			0.0504543	0.050202	0	0	0
		kg N2O			0.00282286	0.00280874	0	0	0
MARGARINE					Per kg margarine
Sweden	1	kg CO2e			2.41728
		kg CO2			0.936825	0.747457	0.1	0.05	0.03
		kg CH4			0.0184949	0.01831	0	0	0
		kg N2O			0.00285782	0.00282924	0	0	0
LOW FAT MARGARINE					Per kg low fat margarine
Sweden	1	kg CO2e			1.27229
		kg CO2			0.550114	0.364613	0.1	0.05	0.03
		kg CH4			0.00902191	0.00893169	0	0	0
		kg N2O			0.00139406	0.00138012	0	0	0
COCOA DRINK POWDER					Per kg cocoa drink powder
Sweden	1	kg CO2e			2.30339
		kg CO2			1.68264	1.43438	0	0.05	0.03
		kg CH4			0.00020418	0.000183762	0	0	0
		kg N2O			0.00205974	0.00185376	0	0	0
SODA					Per liter soda
Sweden	1	kg CO2e			0.405825
		kg CO2			0.376229	0.108606	0.05	0.15	0.03
		kg CH4			2.79698e-05	2.51728e-05	0	0	0
		kg N2O			9.61269e-05	8.65142e-05	0	0	0
CIDER (NON-ALCOHOLIC)					Per liter cider
Sweden	1	kg CO2e			0.477932
		kg CO2			0.444231	0.169808	0.05	0.15	0.03
		kg CH4			3.4214e-05	3.07926e-05	0	0	0
		kg N2O			0.000109189	9.827e-05	0	0	0
BEER (REGULAR)					Per liter beer
Average	1	kg CO2e			0.461326
		kg CO2			0.396262	0.119336	0.0545	0.15	0.0645
		kg CH4			8.37707e-06	8.20953e-06	0	0	0
		kg N2O			0.000217382	0.000213034	0	0	0
Sweden	0.76	kg CO2e			0.442077
		kg CO2			0.356466	0.119336	0.05	0.15	0.03
		kg CH4			1.10225e-05	1.0802e-05	0	0	0
		kg N2O			0.000286029	0.000280308	0	0	0
Denmark	0.09	kg CO2e			0.407486
		kg CO2			0.407486	0.119336	0.05	0.15	0.08
		kg CH4			0	0	0	0	0
		kg N2O			0	0	0	0	0
Rest of Europe	0.15	kg CO2e			0.59116
		kg CO2			0.59116	0.119336	0.08	0.15	0.23
		kg CH4			0	0	0	0	0
		kg N2O			0	0	0	0	0
MINERAL WATER					Per liter mineral water
Average	1	kg CO2e			0.277241
		kg CO2			0.277241	0	0.0547422	0.15	0.0724984
		kg CH4			0	0	0	0	0
		kg N2O			0	0	0	0	0
Sweden	0.62425	kg CO2e			0.23
		kg CO2			0.23	0	0.05	0.15	0.03
		kg CH4			0	0	0	0	0
		kg N2O			0	0	0	0	0
Norway	0.217678	kg CO2e			0.28
		kg CO2			0.28	0	0.05	0.15	0.08
		kg CH4			0	0	0	0	0
		kg N2O			0	0	0	0	0
Rest of Europe	0.158073	kg CO2e			0.46
		kg CO2			0.46	0	0.08	0.15	0.23
		kg CH4			0	0	0	0	0
		kg N2O			0	0	0	0	0
JUICE (AVERAGE)					Per liter juice
Sweden	1	kg CO2e			1.23981
		kg CO2			1.11267	0.721399	0.1	0.15	0.03
		kg CH4			3.68887e-05	3.31998e-05	0	0	0
		kg N2O			0.000422437	0.000380193	0	0	0
ORANGE JUICE					Per liter orange juice
Sweden	0.5	kg CO2e			1.68779
		kg CO2			1.46087	1.03479	0.1	0.15	0.03
		kg CH4			3.21489e-05	2.8934e-05	0	0	0
		kg N2O			0.000757794	0.000682014	0	0	0
APPLE JUICE					Per liter apple juice
Sweden	0.5	kg CO2e			0.791823
		kg CO2			0.764458	0.408012	0.1	0.15	0.03
		kg CH4			4.16284e-05	3.74656e-05	0	0	0
		kg N2O			8.70798e-05	7.83718e-05	0	0	0
SQUASH DRINK (AVERAGE)					Per liter squash drink
Sweden	1	kg CO2e			1.27362
		kg CO2			1.01885	0.636965	0.1	0.15	0.03
		kg CH4			0.000860182	0.000774164	0	0	0
		kg N2O			0.000756776	0.000681099	0	0	0
STRAWBERRY SQUASH DRINK					Per liter strawberry squash drink
Sweden	0.5	kg CO2e			1.24418
		kg CO2			1.08467	0.696203	0.1	0.15	0.03
		kg CH4			0.00159135	0.00143221	0	0	0
		kg N2O			0.000353708	0.000318337	0	0	0
RASPBERRY SQUASH DRINK					Per liter raspberry squash drink
Sweden	0.5	kg CO2e			1.30305
		kg CO2			0.953031	0.577728	0.1	0.15	0.03
		kg CH4			0.000129015	0.000116114	0	0	0
		kg N2O			0.00115984	0.00104386	0	0	0
MILK CHOCOLATE					Per kg milk chocolate
Sweden	1	kg CO2e			6.85688
		kg CO2			2.76807	2.31126	0.1	0.05	0.03
		kg CH4			0.0683169	0.0614852	0	0	0
		kg N2O			0.0059263	0.00533367	0	0	0
POTATO CRISPS					Per kg potato crisps
Sweden	1	kg CO2e			2.89291
		kg CO2			1.92784	0.912894	0.8	0.05	0.03
		kg CH4			0.0134105	0.0124717	0	0	0
		kg N2O			0.00170844	0.00158885	0	0	0
ICE CREAM (DAIRY-BASED)					Per kg ice cream
Sweden	1	kg CO2e			4.28146
		kg CO2			1.26123	0.874927	0.3	0.05	0.03
		kg CH4			0.0645306	0.0642079	0	0	0
		kg N2O			0.00277243	0.00275857	0	0	0

## Sheet: Common input data
Common input data
Characterization factors of greenhouse gases with or without climate-carbon feedbacks (fb)
	Carbon dioxide (CO2)	Methane (CH4)	Nitrous oxide (N2O)	Chlorodifluoromethane (HCFC-22)	Source
GWP100 without fb	1	28	265	1760	Myhre et al. (2013)
GWP100 with fb	1	34	298	2106	Myhre et al. (2013)
GTP100 without fb	1	4	234	262	Myhre et al. (2013)
GTP100 with fb	1	11	297	708	Myhre et al. (2013)
GTP limiting the global warming to 2°C, without fb	1	18	271	1264	Persson et al. (2015)
Emission or sequestration due to soil carbon changes
	Grains	Legumes	Rape seed	Root crops and field vegetables	Ley and perennial tree crops**	Source
Choose factors for soil carbon changes:	0.108272	0.238291	0.159771	0.0399895	-0.091139
IPCC Tier 1, 100 years, kg CO2/kg*	0.190388	0.318474	0.327922	0.0373216	-0.0178627	Calculations with the IPCC Tier 1 approach from the Guidelines for National Greenhouse Gas Inventories (IPCC, 2006)
ICBM, 100 years, kg CO2/kg*	0.108272	0.238291	0.159771	0.0399895	-0.091139	Calculations with the ICBM-model (Andrén & Kätterer, 1997)
*Values < 0 indicates a sequestration of CO2
**Includes fruits, olives, coffee and cocoa as these as for ley have great potential to store carbon in soils depending on management practices (Vicente-Vicente et al., 2016). For both methods, we used the same potential as for ley based on the Tier 1 approach in the IPCC Guidelines, which considers the soil sequestration potential of perennial crops to be similar to that of ley or fallow (IPCC, …
Emission due to land use change
	Soy*	Palm oil*	Source
kg CO2/kg product	1.07807	1.66838	Henders et al. (2015)
*LUC factors are accounted for as an average of the country specific factors available in Henders et al. (2015) due to the limited traceability of the specific origin of soy and palm oil imported to Europe. In Henders et al. (2015), LUC factors are available for countries representing 50 and 82% of world production of soy and palm oil respectively between 2011 and 2015. LUC for soy cultivation do…
Allocation factors
Production system	Product 1	Product fraction obtained from 1 kg input	Economic allocation factor	Product 2	Product fraction obtained from 1 kg input	Economic allocation factor	Product 3	Product fraction obtained from 1 kg input	Economic allocation factor	Source
Rapeseed	Rapeseed oil	0.4	0.72	Rapeseed meal	0.6	0.28				Malmros, H., pers. comm. (2017)
Milled rice	Milled rice	0.62	0.9075	Rice husk, flour and other by-products from milling	0.38	0.0925				Blengini & Busto (2009)
Grains*	Milled grains	0.77	0.91	Brans and middlings	0.23	0.09				Poulsen, J.H., pers. comm. (2019)
Sugar	Processed sugar	0.7	0.8	Beet pulp and molasses	0.3	0.2				Flysjö et al. (2008)
Soy beans	Soy oil	0.18	0.35	Soy meal	0.82	0.65				Flysjö et al. (2008)
Palm oil	Palm oil	0.79	0.85	Palm kernal oil	0.1	0.12	Palm kernal meal	0.11	0.03	Flysjö et al. (2008)
Cocoa beans	Cocoa powder	0.308	0.24	Cocoa butter	0.225	0.375	Liquor and shells	0.467	0.386	Recanati et al., 2018
Tomato**	Tomato		0.9	Electricity		0.1				European Commission (2017), European Commission (2016), average 2011-2015
Cucumber**	Cucumber		0.91	Electricity		0.09				European Commission (2017), European Commission (2016), average 2011-2015
Bell pepper**	Bell pepper		0.91	Electricity		0.09				European Commission (2017), European Commission (2016), average 2011-2015
Strawberry**	Strawberry		0.906667	Electricity		0.0933333				Average of allocation of other products grown in Dutch greenhouses, average 2011-2015
Milk	Milk		0.927909	Beef from milk production		0.0720911				LRF Mjölk (2016), SBA (2014a), SBA (2017a), average 2011-2015
Butter***	Butter		0.48	Skimmed milk		0.51	Buttermilk		0.01	National Food Agency (2017), Löfgren, R., pers. comm. (2017)
Cream***	Cream		0.5	Skimmed milk		0.5				National Food Agency (2017), Löfgren, R., pers. comm. (2017)
Cheese***	Cheese		0.94	Whey		0.06				National Food Agency (2017), Löfgren, R., pers. comm. (2017)
Crème fraiche***	Crème fraiche		0.51	Skimmed milk		0.49				National Food Agency (2017), Löfgren, R., pers. comm. (2017)
Cod fish and salted roe	Cod fish	0.9	0.95	Roe	0.1	0.05				Orkla Foods Sverige Konsumentkontakt, pers. comm. (2019); Ziegler & Bergman (2017)
*Data for wheat is used as approximation for other cereals.
**Only for Dutch greenhouses which produce surplus electricity in combined heat and power installations. The electricity is sold to the national electricity grid (van der Velden and Smit, 2016).
***Allocation of dairy products is made based on the economic value according to the protein and fat in the dairy products according to price data from Skånemejerier. For whey, skimmed milk and buttermilk, the economic value is based on price data from Skånemejerier (Löfgren, R., pers. comm., 2017). Protein and fat content in dairy products are derived from the food database of the Swedish Nation…
Emissions from fuels*
	Heating oil	Natural gas	Other fossil energy sources**	Bark and chips	Pellets and briquettes	Other renewable energy sources***	Diesel fuel	District heating****	Source
kg CO2/MJ	0.08056	0.062	0.071	0.0017	0.00365	0.002675	0.07592	0.0246111	Gode et al. (2011)
kg CH4/MJ	3.06e-05	0.00028	0.000155	2.86667e-06	1.75e-05	1.01833e-05	3.363e-05	0
kg N2O/MJ	2.8526e-06	2e-06	1.325e-06	6.76667e-07	7.8e-06	4.23833e-06	2.04e-06	0
*Emissions from production and use of fuels
**Average of heating oil and natural gas
***Average of bark and chips; pellets and briquettes
****Representative for Sweden
Heating values of fuels
	Heating oil	Diesel fuel	Source
MJ/liter	41	35.2	Gode et al. (2011)
Emission factors of electricity											Source
	Nordic electricity mix	European electricity mix*	Brazil	China	New Zeeland**	Thailand	Turkey	United States	Vietnam	Rest of the world	Nordic: Gode et al. (2011), European: EEA (2017), New Zeeland: MBIE (2017), Vietnam: Brander et al. (2011)
kg CO2e/kWh	0.097	0.295	0.25007	1.0234	0.135	0.67132	0.65593	0.66899	0.467	0.7361	All other: Ecoinvent Centre (2018). Activity name: “Market for electricity, medium voltage” for each country
*Without Russia and Turkey, average 2011-2014
**Average 2011-2015
Emissions from the production of N mineral fertilizer
	Best Available Technology (BAT)	Ammonium nitrate*	Source
kg CO2/kg fertilizer produced	2.3	2.82364	BAT: Yara International (2010)
kg CH4/kg fertilizer produced	0	1.6796e-08	Ammonium nitrate: Ecoinvent Centre (2018). Activity name: “Ammonium nitrate production", Rest of the world
kg N2O/kg fertilizer produced	0.00436242	0.018938
*Ammonium nitrate is commonly used as nitrogen mineral fertilizer (Berglund et al., 2009)
Use of N mineral fertilizer, fractions
	Sweden and the Nordic countries	Europe	Other countries	Source
Best Available Technology (BAT)	0.6	0.3	0.1	Swedish Agency for Public Management (2010)
Ammonium nitrate	0.4	0.7	0.9
Emissions from the production of capital goods
	Plant-based foods, feed for cattle, pigs, fowls and fish in aquaculture systems	Source
kg CO2/kg product	0.03	Fixed value based on Frischknecht et al. (2007)
For wild-caught seafood, impact from capital goods (e.g. boats and fishing gear) is assumed to be negligible based on Winther et al. (2009).
Set values for emissions from the production of packaging materials
	kg CO2e/kg product	Source
Berries	0.15	Based on Wallman and Nilsson (2011), Nilsson et al. (2009) and Stripple et al. (2014)
Vegetable oil	0.3
All other plant-based foods	0.05
Soda, cider, beer, mineral water, juice and squash drink	0.15
All other processed foods	0.05
Dairy products	0.05
Eggs, beef, pork and poultry meat	0.1
Herring, mackerel and salted roe	0.3
Other fish and seafood	0.1
Set values for emissions from transportation of food
	Emission, kg CO2e/kg transported to Sweden (sea and/or road)	Emission factor, kg CO2e/kg transported by road in Sweden	Source
Nordic and Baltic countriesa	0.05	0.03	Transportation to Sweden: NTM (n.d.)
West Europeb	0.1	0.03	Transportation in Sweden: Swedish Climate Certification for Food (2010)
South Europec	0.2	0.03
East Europed	0.3	0.03
Rest of Europe	0.2	0.03
West Africae	0.3	0.03
North, Central and South Americaf	0.3	0.03
Southeast Asiag	0.4	0.03
China	0.5	0.03
Oceaniah	0.5	0.03
Rest of the world	0.4	0.03
aIncludes Denmark and Norway
bIncludes Germany, Belgium, the Netherlands, France and Ireland
cIncludes Italy and Spain
dIncludes Greece and Turkey
eIncludes Ivory Coast
fIncludes United States, Panamá, Costa Rica, Brazil and Ecuador
gIncludes Thailand and Vietnam
hIncludes New Zeeland
ADDITIONAL INFORMATION ABOUT TRANSPORTATION CALCULATIONS: Default load factors that NTM provides are used which represent a typical transport as carried out today (70% for both ships and large trucks). Sea transports are assumed to be carried out with large ocean container ships whereas road transports are assumed to take place with large trucks with trailers loading up to 60 tons. It is assumed …
Waste fractions for different product groups in different regions, from postharvest until retailer in Sweden*
	Europe	North America and Oceania	Southeast Asia**	Industrialized Asia***	Latin America	Sub-Saharan Africa	Rest of the world average	Source
Fruits and vegetables	0.1621	0.15328	0.38575	0.18856	0.352	0.38575	0.27124	Gustavsson et al. (2011)
Grains and rice	0.157514	0.139962	0.120499	0.210169	0.142555	0.129956	0.150109
Roots and tubers	0.280645	0.28855	0.32203	0.264835	0.296176	0.35179	0.300671
Oilcrops and legumes	0.068905	0.0595	0.198496	0.087715	0.116524	0.162064	0.115534
Fish and seafood	0.148877	0.148877	0.221586	0.161708	0.213305	0.221586	0.18599
Meat****	0.088	0.088	0.088	0.088	0.088	0.088	0.088
Dairy products and eggs*****	0.0218553	0.0218553	0.083406	0.0267706	0.083406	0.115336	0.0587715
*The same fraction for retail waste is used for all products and regions.
**Includes Thailand, Vietnam and Malaysia
***Includes China
****Waste fractions for "post harvest handling and storage" (mortality rate during transportation to slaughter and rejection rate at slaughterhouse) for meat are included directly in the calculations to account for the animals needed in production.
*****The same waste fraction as milk is assumed for other dairy products and eggs
No consideration is taken of how the waste is handled after leaving the system, e.g. whether the waste is composted or used for energy production.
Waste fractions for processed product groups, at Swedish retail*
Products based on fruits and vegetables	0.1	Source
Products based on grains and rice	0.02	Gustavsson et al. (2011)
Products based on roots and tubers	0.07
Products based on oilcrops	0.01
Dairy products	0.005
*Assumed to have the same waste fraction as the raw material
No consideration is taken of how the waste is handled after leaving the system, e.g. whether the waste is composted or used for energy production.

[truncated: 8 more sheets: Input data meat and eggs, Input data dairy products, Input data fish and seafood, Input data plant-based products, Input data processed products, Excluded data, Maintenance of data, Reference list]
